1  
2  
3  
4  
5  
6  
7  
8  
9  
10  
11  
12  
13  
14  
15  
16  
17  
18  
19  
20  
21  
22  
23  
24  
25  
26  
27  
28  
29  
30  
31  
32  
33  
34  
35  
36  
37  
38  
39  
40

Natural mismatch repair mutations mediate phenotypic diversity and drug resistance in *Cryptococcus*  
*deuterogattii*

R. Blake Billmyre, Shelly Applen Clancey, and Joseph Heitman\*

Department of Molecular Genetics and Microbiology, Duke University Medical Center, Durham, NC,  
USA

\*Corresponding author:  
Room 322 CARL Building  
Box 3546 Research Drive  
Department of Molecular Genetics and Microbiology  
Duke University Medical Center, Durham, NC 27710, USA  
Email: [heitm001@duke.edu](mailto:heitm001@duke.edu)  
Phone: (919) 684-2824  
Fax: (919) 684-2790

41 **Abstract**

42 Pathogenic microbes confront a constant evolutionary conflict between the pressure to maintain  
43 genome stability and the need to adapt to mounting external stresses. Prokaryotes often respond with  
44 elevated mutation rates, but to date little evidence exists of stable eukaryotic hypermutators in nature.  
45 Whole genome resequencing of the human fungal pathogen *Cryptococcus deuterogattii* identified an  
46 outbreak lineage characterized by a nonsense mutation in *MSH2*. This defect in mismatch repair results  
47 in a moderate mutation rate increase in typical genes, and a larger increase in genes containing  
48 homopolymer runs. This allows facile inactivation of genes with coding homopolymer runs including  
49 *FRR1*, which encodes the target of the immunosuppressive antifungal drugs FK506 and rapamycin. Our  
50 study identifies a eukaryotic hypermutator lineage spread over two continents and suggests that  
51 pathogenic eukaryotic microbes may experience similar selection pressures on mutation rate as  
52 bacterial pathogens, particularly during long periods of clonal growth or while expanding into new  
53 environments.

54 **Introduction**

55           Mutation is the raw material of evolution. As a result, all organisms must strike a balance  
56 between allowing enough random mutations for selection to act upon, and the fact that most of these  
57 mutations are likely to be deleterious and must be purged from the population. This is particularly true  
58 for pathogenic microbes that take part in Red Queen conflicts with their hosts and require a continuous  
59 supply of mutations to maintain competitive fitness. In this case, increased pressure may exist to  
60 maintain an elevated mutation rate to increase the rate of adaptation. Increases in mutation rate may  
61 also serve to accelerate adaptation when microbes are introduced into new environments or encounter  
62 novel stresses, such as antimicrobial therapy.

63           Adaptive variation in mutation rate is common in bacteria. One example is the Long Term  
64 Evolution Experiment (LTEE), where defects in DNA repair emerged and the resulting hypermutator  
65 phenotype swept the population in six out of twelve *E. coli* lines (1). Mutator alleles likely emerge  
66 frequently but are typically purged from the population because individual mutations are more likely to  
67 be deleterious than adaptive; as a result hypermutators generally produce less fit offspring than non-  
68 hypermutators. However, occasionally a sufficiently beneficial mutation is potentiated by the presence  
69 of the hypermutator and the hypermutator allele is able to hitchhike to higher frequency within the  
70 population. This is more likely to occur in populations at local evolutionary minima, where many  
71 different large-effect adaptive mutations are possible. For example, hypermutator phenotypes are  
72 common in isolates of *Pseudomonas aeruginosa* growing within the lungs of patients with Cystic  
73 Fibrosis, where environmental conditions are constantly changing (2). This changing environment  
74 causes an ongoing need to adapt, and increases the likelihood of hypermutators emerging by increasing  
75 the target size for adaptive variation. However, once beneficial mutations have fixed, and organisms  
76 have adapted to their new environment, antimutator suppressor alleles can emerge to reduce the

77 mutation rate or defective mutator alleles can even be replaced by functional alleles through horizontal  
78 gene transfer (3, 4). This balance is likely critical to evolution in microbes as they face diverse stresses  
79 and environmental changes, and as a result over 1% of natural bacterial isolates display hypermutator  
80 phenotypes (5). Even more extreme cases also exist, like in *Mycoplasma pneumoniae* and *M.*  
81 *genitalium*, where the mismatch repair machinery has been completely lost (6).

82 In fact, many mutator phenotypes are the result of defects in mismatch repair, commonly  
83 referred to as MMR. In bacteria, MMR requires the MutHLS system, where MutS binds to mismatches  
84 and recruits MutL, which subsequently activates MutH to excise the mispair (7–10). In eukaryotes,  
85 both the MutS and MutL families have expanded, yielding MutS homolog (MSH) (11) and MutL  
86 homolog (MLH) families (12). Heterodimers of various MSH family members participate in mismatch  
87 repair, but Msh2 in particular is a core component of the majority of mismatch repair pathways in yeast  
88 (13). As a result, defects in MMR, and *MSH2* mutations in particular, result in elevated rates of simple  
89 mismatches, but also dramatically elevated rates of repeat tract instability (12), which are associated  
90 with hereditary colon cancer in humans. MMR also plays a role in rejecting heteroduplexes of  
91 divergent sequences during both mitosis (14) and meiosis (15), meaning that loss of the complex can  
92 lower species boundaries and allow increased recombination between divergent chromosomes (15, 16).

93 In contrast to bacteria, substantially less is known about hypermutators in natural populations of  
94 eukaryotes. Evolutionary theory predicts that the presence of sex abrogates selection for hypermutator  
95 strains by eliminating genetic linkage between the mutator allele and the associated beneficial  
96 mutations it hitchhikes upon to high frequency (17). Studies of allele incompatibility within the model  
97 fungus *Saccharomyces cerevisiae* have supported this traditional paradigm. Incompatible alleles of  
98 *PMS1* and *MLH1* exist within the population, such that a cross of two strains with wildtype mutation  
99 frequency can give rise to progeny with elevated mutation rates (18, 19). However, the homozygous

100 incompatible arrangement was not found among any of the original 65 strains examined, and was only  
101 identified within one clinical isolate of 1,010 global diverse yeast isolates (20) and four clinical strains  
102 out of 93 sequenced in a separate study (21). This frequency is far below that of the individual alleles in  
103 the population, and in each case observed suppressors had arisen to restore a wildtype mutation rate  
104 despite the incompatibility. In contrast, eukaryotic mutators can adapt and thrive in clonally expanding  
105 populations such as in human tumor environments (22). Recent studies of *Candida glabrata* have  
106 begun to challenge this dogma in eukaryotic microorganisms as well, with over 50% of clinical *C.*  
107 *glabrata* isolates harboring loss of function mutations in *MSH2*, a critical component of mismatch  
108 repair (23). In previous work we also identified a clade of candidate hypermutators within the Pacific  
109 Northwest *Cryptococcus deuterogattii* outbreak that contain a coding single base deletion within the  
110 critical mismatch repair component *MSH2* (24).

111 *Cryptococcus deuterogattii*, previously known as *Cryptococcus gattii* VGII (25), is a  
112 basidiomycete human fungal pathogen. Unlike the other species of the *Cryptococcus* pathogenic  
113 species complex that infect immunocompromised hosts, *C. deuterogattii* is characterized by its ability  
114 to cause infection in otherwise healthy hosts (26) and by loss of the RNAi pathway (27, 28). *C.*  
115 *deuterogattii* is responsible for an ongoing outbreak in the Pacific Northwest region of the United  
116 States and Canada, which began in the late 1990's (29). This outbreak was originally analyzed using  
117 Multi-locus sequence typing (MLST) and shown to be comprised of three clonal expansions, denoted  
118 VGIIa, VGIIb, and VGIIc (30, 31). These three subtypes differ in terms of virulence and total number  
119 of cases, with VGIIa, responsible for the majority of infections. More recently, whole genome  
120 sequencing studies of these subpopulations showed that the clonal subtypes appeared to have different  
121 proximal geographic origins, and most interestingly, that VGIIa has three very closely related isolates,  
122 here referred to as VGIIa-like, that were considerably less virulent and differed in isolation location or

123 date from the outbreak (24). We identified a candidate potential large effect mutation shared by these  
124 three diminished virulence isolates that resulted in a predicted non-functional Msh2. Here we show that  
125 these VGIIa-like isolates exhibit a *bona fide* hypermutator phenotype. Furthermore, we show that  
126 homopolymer runs are particularly unstable, and that these runs are common within the coding regions  
127 of genes in the *Cryptococcus* genome. We predict that this results in dramatic phenotypic diversity  
128 from inactivation and possibly also activation or reactivation of genes. Finally, we show that the mutant  
129 *msh2* allele is not directly responsible for the decrease in virulence of the VGIIa-like isolates, nor does  
130 it appear to have directly played a role in the evolution of virulence in the VGIIa clonal outbreak.  
131 Rather, it appears to represent a parallel route of adaptation to a new environment in a successful  
132 lineage isolated from two continents over two decades and from both the environment and patient  
133 samples. This work suggests that hypermutator phenotypes are not limited to prokaryotes, but may  
134 represent a frequent avenue to evolutionary change and phenotypic diversity in eukaryotic microbes as  
135 well.

136

## 137 **Results**

138 We previously identified a sublineage of strains highly related to the VGIIa outbreak in the  
139 Pacific Northwest denoted VGIIa-like, in part because they differed either in isolation location or time  
140 from the typical outbreak isolates (24). The VGIIa-like sublineage is composed of three isolates:  
141 NIH444, a clinical isolate from Seattle in 1975, well before the start of the outbreak; ICB107, a clinical  
142 isolate from Brazil in 1981; and CBS7750, an environmental isolate from California in 1990. All three  
143 isolates are characterized by diminished virulence relative to the VGIIa clonal outbreak strains (30–  
144 32). The analysis here includes additional genomes for a South American outgroup to both the VGIIa-  
145 like and VGIIa groups (33) (Figure 1A) as well as alignment of these genomes to the improved *C.*

146 *deuterogattii* genome assembly (34). This allowed determination of the ancestral state of the multiple  
147 alleles differentiating the VGIIa and VGIIa-like groups. We also generated a second independent  
148 genome sequence for our original NIH444 isolate (NIH444(1) and NIH444(2)), as well as an NIH444  
149 isolate acquired from a different lab (NIH444(v)). We identified a total of 18 mutations that are shared  
150 by all of the VGIIa-like isolates sequenced: 13 SNPs and 5 INDELs (Table 1). Five SNPs are  
151 noncoding while the remaining eight coding SNPs are characterized by a high rate of nonsynonymous  
152 mutations (7/8 coding mutations). In addition we confirmed that one of the INDELs in this branch is a  
153 single base deletion in a coding exon of *MSH2* (24). This deletion is unique to the VGIIa-like group.

154 We confirmed both the presence of this mutation and showed that it results in a hypermutator  
155 phenotype. Sanger sequencing verified that this single base deletion is not an Illumina sequencing  
156 artifact (Figure 1B). This single base deletion occurs within an early exon of *MSH2* and results in a  
157 nonsense mutation, with both an out of frame message and an early stop codon present in the predicted  
158 transcript (Figure 1C).

159

### 160 ***MSH2* defect results in hypermutator phenotype**

161 Because Msh2 is a critical component of the mismatch repair complex, we next tested whether  
162 the VGIIa-like strains displayed an increased mutation rate. We utilized a standard fluctuation assay  
163 approach to determine the rate of 5-FOA resistance, as previously applied in *Cryptococcus* (35). The  
164 resistance rate was increased in the hypermutator lineage between 4.4-fold at the minimum (CBS7750)  
165 and 6.6-fold at the maximum (ICB107) compared to the type strain VGIIa R265 (Figure 2A). The  
166 majority of 5-FOA resistance in *Cryptococcus neoformans* is acquired through mutation of *URA5* (36);  
167 therefore, the *URA5* locus was PCR amplified and sequenced in independently derived 5-FOA resistant  
168 isolates to determine the genetic basis of resistance. Mutations were characterized as either

169 substitutions, or indels of either single or multiple bases (Figure 2B). The majority of resistant isolates  
170 were the result of substitutions, and the mutation profile was similar between the hypermutator VGIIa-  
171 like strains and the non-hypermutator VGIIa strain EJB17 (EJB17 vs NIH444: P=1.00, EJB17 vs  
172 CBS7750 P= 0.60, EJB17 vs ICB107 p= 1.00, Fisher's Exact Test).

173

#### 174 ***MSH2* mutants accumulate indels in homopolymer runs**

175       Next, the whole genome data was analyzed to ascertain whether the similarity in mutation  
176 spectrum observed in the *URA5* locus was recapitulated at multiple loci or if the *URA5* locus had  
177 unique properties. To do this, we focused on two relatively long branches within the *C. deuterogattii*  
178 phylogeny: the branch separating the outgroup VGIIb strain R272 from the VGIIa clonal cluster  
179 (58,375 variants) and the private ICB107 variants, which represented the longest available  
180 hypermutator branch (763 variants) (Figure 8). The frequency of individual SNPs was examined first.  
181 While a high rate of transitions as compared to transversions was maintained in the hypermutator  
182 branch, there was a slight reduction in the frequency of A->G and T->C mutations relative to C->T and  
183 G->A mutations (Figure 3A). However, much more striking was a dramatic increase in indels within  
184 homopolymer runs (Figure 3B). While shifts in homopolymer runs in the R272 branch account for only  
185 0.7% of the variants, in ICB107 they account for 42.9%, exceeding even the proportion of SNPs.

186       By looking further at the context of the homopolymer run mutations within the ICB107 branch,  
187 it is apparent that longer base runs appear to be less stable than shorter runs, as approximately 17% of  
188 the mutations occur within the context of a nine base homopolymer run (Figure 3C). This peak is likely  
189 a function of both the decreased stability of longer runs and the low quantity of longer homopolymer  
190 runs in the genome. Many of these longer runs occur within intergenic regions in the genome, but a  
191 substantial portion of the coding genes in *C. deuterogattii* contain at least one longer coding



192 homopolymer run (Figure 3C). The longest homopolymer run in the *URA5* locus contains only four  
193 bases, which is predicted to be both relatively stable and among the coding genes with relatively  
194 shorter homopolymer runs (Figure 3C). In contrast, the *FRR1* gene that encodes the FKBP12 homolog  
195 responsible for the antifungal action of both FK506 and rapamycin has a run of seven cytosines (7C)  
196 within its coding region. This places it both within the range of commonly mutated homopolymers in  
197 the ICB107 branch, and in the upper half of homopolymer containing genes in *C. deuterogattii*,  
198 suggesting that *FRR1* is an appropriate locus to test the effect of mismatch repair mutants on  
199 homopolymers containing genes (Figure 3C).

200

### 201 **Genes containing homopolymer runs are highly unstable in *msh2* mutants**

202 The *FRR1* locus was utilized to further assess whether VGIIa-like strains were hypermutators  
203 at more than one locus and to test the hypothesis that homopolymer runs are particularly unstable in  
204 these isolates. The protein product of *FRR1*, FKBP12, binds to either FK506 or rapamycin to form a  
205 protein-drug complex that inhibits calcineurin or TOR, respectively. By selecting with both drugs at the  
206 same time at the non-permissive temperature of 37°C, loss of function mutations in *FRR1* are selected  
207 as the only single step mutation conferring resistance to both drugs. Here we utilized a semi-  
208 quantitative assay to identify gross differences in mutation rate whereby independent colonies were  
209 grown in liquid culture and then swabbed onto quadrants of a selective plate. On FK506/rapamycin  
210 media, the wildtype strains produced a small number of resistant colonies (Figure 4A). In contrast, the  
211 NIH444 hypermutator strain produced prolific FK506/rapamycin resistant colonies. Surprisingly, the  
212 CBS7750 hypermutator was completely resistant to both drugs. Upon examining the *FRR1* locus in the  
213 whole genome sequence data we discovered that there was already a single base deletion within the 7C  
214 homopolymer run in this strain. This may represent an unselected drug resistance phenotype

215 potentiated by the *msh2* defect. We attempted to use this assay for the ICB107 strain as well but were  
216 unsuccessful, likely as a result of its inability to grow at the higher growth temperature necessary for  
217 this assay that is based upon calcineurin-dependent growth at 37°C (Figure 7B).

218       Next a standard fluctuation assay approach was employed to quantify the mutation rate  
219 difference between the VGIIa and VGIIa-like hypermutators. There was a greater than 120-fold  
220 increase in mutation rate to FK506/rapamycin resistance in NIH444 compared to R265, in contrast with  
221 the maximum of 6.6-fold increase observed for 5-FOA resistance (Figure 4C). As before, we selected  
222 independent resistant colonies, PCR amplified, and sequenced the *FRR1* gene to determine the  
223 mechanism of resistance. All resistance was explained by mutations within *FRR1* as expected, but  
224 while R265 still primarily acquired resistance through substitutions, NIH444 now almost exclusively  
225 underwent single base additions or single base deletions, all within the 7C homopolymer run (R265 vs  
226 NIH444,  $p=0.0003$ , Fisher's Exact Test). These indels resulted in nonsense mutations and resistance to  
227 both FK506 and rapamycin.

228

### 229 **Hypermutation phenotype is linked to the *msh2* defect**

230       Once we established a *bona fide* hypermutator phenotype in the VGIIa-like strains, we sought  
231 to verify that this phenotype was linked to the *msh2* del131 allele. We crossed the NIH444 strain to a  
232 very closely related R265a congenic strain recently generated by serial backcrossing (37). *C.*  
233 *deuterogattii* matings are less fertile than *C. neoformans*, but we successfully dissected 14 viable spores  
234 from this cross. We typed these strains for the *MSH2* allele by sequencing and observed 1:1 segregation  
235 of the *MSH2* and the *msh2* del131 alleles. The spores were then tested for rate of FK506/rapamycin  
236 resistance using the same semi-quantitative swabbing assay described above (Figure 5A). While five of  
237 the *msh2* del131 strains displayed the predicted hypermutator phenotype, surprisingly two of the spores

238 (#4 and 5) appeared wildtype despite inheritance of a defective copy of *MSH2*.

239 Mating in *Cryptococcus* has previously been demonstrated to produce phenotypic plasticity  
240 through generation of aneuploid progeny at a high rate (38). These aneuploids often display defects in  
241 growth at high temperature; thus, we tested whether the high growth temperature of 37°C employed in  
242 our FK506/rapamycin resistance assay may have masked the ability of these meiotic progeny to  
243 develop drug resistance. Congruent with this hypothesis, both spore products #4 and #5 demonstrated  
244 growth defects at 37°C and 39°C (Figure 5C). Whole genome sequencing confirmed that both  
245 segregants carried an extra copy of one chromosome, suggesting that a 1N+1 aneuploidy was causing  
246 temperature sensitivity (Figure 5B). In fact, all of the progeny from this mating had an unusually high  
247 rate of aneuploidy with 8 of the 14 progeny aneuploid for at least one scaffold/chromosome (Table 2).  
248 By passaging all of the spores on YPD at 37°C we were able to restore the ability to grow at high  
249 temperatures in all of the progeny after four to nine passages after which all no longer demonstrated a  
250 high temperature growth defect (Figure 5C). As a result the passaged derivatives of isolates #4 and #5  
251 now demonstrated a hypermutator phenotype as expected (Figure 5D) and all 14 progeny produced the  
252 results predicted through linkage of the *msh2* defect to the hypermutator phenotype (Supplemental  
253 Figure 1). Further, whole genome typing of the 14 meiotic progeny demonstrated that sufficient  
254 recombination had occurred to establish linkage. All 14 progeny demonstrated unique SNP profiles and  
255 only one SNP demonstrated inheritance congruent with the hypermutator phenotype: a SNP on scaffold  
256 3 that was linked to the *msh2* del131 indel (~175 kb) (Figure 5E).

257 As a final verification of phenotypic linkage, we constructed two independent deletions of the  
258 *MSH2* gene in the R265 VGIIa background via biolistic transformation and homologous recombination  
259 replacing the *MSH2* ORF with a neomycin resistance cassette. A complete deletion of *MSH2* resulted in  
260 the same hypermutator phenotype as the *msh2* del131 allele, providing further evidence that the

261 hypermutator phenotype was linked to the loss of function in *MSH2* (Figure 5F). A fluctuation assay  
262 was used to determine the mutation rate for resistance to FK506 and rapamycin and demonstrated that  
263 the null mutants did not have an elevated mutation rate in comparison to the NIH444 strain (Figure  
264 5G). This suggests that suppressors have not arisen on the NIH444 background to moderate the effects  
265 of the *msh2* del131 allele.

266

### 267 **Hypermutation enables phenotypic diversity including reversion of mutations**

268 During growth of the *msh2*Δ::*NEO* strains a spontaneous *ade2* mutant was fortuitously  
269 identified based on its classic red pigmentation (Figure 6A). We verified that this was the result of a  
270 defect in adenine biosynthesis as this strain grows on YNB supplemented with adenine, but not YNB  
271 media (Figure 6B). As expected, sequencing of the *ADE2* locus revealed that the *ade*<sup>-</sup> phenotype was  
272 linked to a single base mutation that results in a His->Arg amino acid change (Figure 6C).

273 The red pigment produced by *ade2* mutants is a toxic intermediate in adenine synthesis that  
274 accumulates in the vacuoles of mutant cells. As a result, these mutants have a growth defect, and  
275 suppressor mutations can readily be isolated that eliminate production of this toxic intermediate and  
276 now produce white colonies (Figure 6C). We isolated two red and two white derivative colonies and  
277 sequenced the *ADE2* locus. While the red colonies retained the causative substitution, one of the white  
278 colonies retained it and the other had undergone reversion at this site back to the functional nucleotide  
279 (Figure 6C). We confirmed that the revertant isolate was no longer an adenine auxotroph and that the  
280 second white isolate was still auxotrophic, despite the lack of pigmentation (Figure 6D). This is likely  
281 the result of a second mutation upstream in the adenine biosynthetic pathway, resulting in further  
282 inactivation and loss of the ability to produce the toxic red intermediate. We tested a number of  
283 independent white reverted colonies for the ability to grow on media lacking adenine and observed that

284 direct reversion to functional adenine biosynthesis was more common than additional inactivating  
285 mutations, with 37/42 (88%) white colonies demonstrating adenine prototrophy (Figure 6E). Taken  
286 together, these results suggest that hypermutation allows both frequent inactivation of pathways, and  
287 also the means to either adapt to the consequences or to simply directly revert the original mutation. In  
288 the context of antifungal drug action or activity, this phenotypic switching could be highly important.

289

### 290 **Hypermutation does not directly affect virulence**

291 We previously demonstrated that the VGIIa-like mutants exhibit diminished virulence in a nasal  
292 instillation model of virulence (30, 31). Here, we tested whether loss of Msh2 function was directly  
293 responsible for the decrease in virulence but observed no difference in virulence between R265 and two  
294 independent *de novo* deletions of *msh2* (Figure 7A). This suggested that the defects in murine virulence  
295 in the VGIIa-like isolates could be the result of multiple independent deleterious mutations unique to  
296 each lineage. We next tested the ability to grow at higher temperature, a critical virulence factor, in the  
297 VGIIa-like isolates. All three isolates showed defects in high temperature growth, varying from minor  
298 defects in NIH444, the isolate with the shortest branch to R265, to moderate defects in CBS7750, the  
299 isolate with an intermediate length branch, and finally severe defects in ICB107, the isolate with the  
300 longest branch affected by the hypermutator (Figure 7B). This suggests that instead of an immediate  
301 change in virulence, defects in mismatch repair may instead result in loss of virulence over time as  
302 mutations accumulate in critical pathways. Thus, rather than the virulence difference being explained  
303 by a single change or set of changes shared by all three VGIIa-like strains, instead they may all be  
304 avirulent for their own unique reasons.

305

### 306 **Hypermutation is deleterious in rich conditions, but advantageous under stress**

307 Our data suggests that over time a high mutation rate comes at a cost to organisms. We next  
308 addressed the early stages of hypermutator emergence and the direct effects of Msh2 inactivation to  
309 address if temporary benefits may be conferred. To this end, independent *msh2 de novo* deletions were  
310 employed in competition experiments with wildtype R265. Briefly, liquid YPD cultures were mixed in  
311 50:50 ratios of wildtype R265 and a neomycin resistant *msh2* mutant or a random insertion of the  
312 neomycin resistance cassette as a control. After 48 hours incubation, co-cultures were spread onto YPD  
313 plates and then colonies were picked and restruck to media containing neomycin to determine the  
314 percentage of colonies derived from each original strain. If mutations are neutral, the expectation is that  
315 the 50:50 ratio will be maintained. Instead, growth defects were observed for the *msh2* mutants at either  
316 30°C or 37°C, suggesting that the *msh2* mutation is deleterious under rich growth conditions (Figure  
317 7C). Notably, in three of the 24 replicates at 30°C or 37°C the *msh2* mutant was able to grow  
318 moderately better than the wildtype parent strain. This may indicate that in these individual  
319 experimental replicates the hypermutator allowed a beneficial mutation and hitchhiked to higher  
320 frequency. However, under highly stressful conditions, such as exposure to the drugs FK506/rapamycin  
321 at 37°C, the hypermutator was highly advantageous. In multiple replicates the hypermutator rapidly  
322 acquired resistance and overtook the entire co-culture. This suggests that mutator alleles can be  
323 advantageous when a population faces an evolutionary landscape where large effect beneficial  
324 mutations exist. In contrast, mutators are deleterious in landscapes where few large effect mutations  
325 can provide advantages. Antifungal treatment and transitions from environment to host are likely to  
326 provide opportunities for adaptive mutation and favor mutator alleles.

327

### 328 **Hypermutator lineage is derived and hypermutation did not cause the VGIIa outbreak**

329 Historically, *C. deuterogattii* has been thought of as a tropical and subtropical pathogen. As a

330 result, the origin of the VGIIa outbreak in the Pacific Northwest, a non-tropical environment, was  
331 surprising. In addition, 1) the South American origin of the ICB107 strain (within the proposed cradle  
332 of the *C. deuterogattii* species (32)), 2) the isolation of NIH444 in Seattle near the outbreak origin, and  
333 3) the diminished virulence of the VGIIa-like subclade (30, 31), all combined to suggest that the  
334 VGIIa-like group might have been the immediate precursors to the clonal VGIIa outbreak cluster (24,  
335 33). Identification of the hypermutator phenotype further suggested that the defect in *Msh2*, carried by  
336 the older VGIIa-like group, may have played a role in adaptation to the climate of the Pacific  
337 Northwest and may have even potentiated the increase in virulence. To test this, a maximum parsimony  
338 phylogeny of the VGIIa-like and VGIIa strains was constructed, including additional sequences for a  
339 related South American VGII clade not included in our previous analysis (33) and using the VGIIb  
340 R272 strain as an outgroup (Figure 8). As described above, the *msh2* mutation can allow restoration of  
341 function mutations at the exact mutation site that are indistinguishable from the original sequence  
342 (Figure 6). Likewise, mating could also reintroduce a functional *MSH2* allele. For these reasons, we  
343 tested for the possible presence and impact of the past *msh2* del131 mutator allele throughout the  
344 phylogeny by examining the imputed mutation spectrum.

345 As discussed above (Figure 3), branches with defects in mismatch repair show an increased  
346 frequency of shifts in homopolymer runs. Increases in homopolymer run shifts were observed only on  
347 the most proximal branch ancestral to the VGIIa-like mutator lineage. This suggests that the mutator  
348 phenotype is congruent with the presence of the allele throughout the VGIIa-like phylogeny, and that  
349 the VGIIa group did not experience a transient period of *msh2* mediated hypermutation, followed by  
350 repair or mating-mediated replacement. Instead, the VGIIa-like lineage may represent a unique  
351 pathway to adaptation distinct from that followed by the VGIIa group that resulted in diminished rather  
352 than enhanced virulence.

353

354 **Discussion**

355         In this study we have identified and characterized a successful lineage of eukaryotic  
356 hypermutators. Elevated mutations rates are a common adaptive mechanism in bacteria, but are  
357 typically thought of as transient states that allow beneficial mutations in the short term but are selected  
358 against in the long term (3). Bacteria solve this problem through horizontal gene transfer of genes from  
359 the mismatch repair pathway, allowing the initial beneficial mutation to be separated from the  
360 deleterious mutator allele (4). In contrast, few cases have been identified in natural isolates of  
361 eukaryotes, suggesting that variation in mutation rate may play a less substantial role than in bacteria.  
362 Two recent studies have identified exceptions to this rule. In *S. cerevisiae*, incompatible alleles of  
363 *PMS1* and *MLH1* result in elevated mutation rates if present in combination (18, 19). However, in the  
364 rare cases where the incompatible arrangement is found in nature, additional suppressors have arisen to  
365 restore wildtype mutation rate, suggesting that hypermutator phenotypes may not be tolerated over long  
366 periods of time (20, 21). In addition, a recent study of *Candida glabrata* has demonstrated that a  
367 substantial proportion of clinical isolates (>50%) carry nonsynonymous mutations in the *MSH2* gene,  
368 some causing elevated mutation rates similar to the null phenotype and others with intermediate  
369 changes in mutation rate (23). The authors correlate the mismatch repair defects with multi-drug  
370 resistance. A second study with a different sample cohort confirmed the presence of *MSH2* mutations,  
371 but concluded that drug resistance was better correlated with drug exposure than with mismatch repair  
372 defects (39).

373         In contrast with the studies in *S. cerevisiae* and *C. glabrata*, here we identified a group of viable  
374 hypermutator strains resulting from a nonsense mutation in *MSH2*. These strains were isolated over a  
375 period of fifteen years from two different continents and include both clinical and environmental



376 strains. In addition, the *msh2* del131 allele carried by these strains results in a complete loss of  
377 function, rather than simply reducing the efficiency of mismatch repair. This is distinct from the  
378 mutators identified in *C. glabrata*, and suggests that the VGIIa-like lineage is a successful and  
379 relatively long-lived hypermutator lineage, capable of both disseminating over a large area and  
380 persisting in the environment. *Cryptococcus deuterogattii* may also represent an intermediate between  
381 mutator-rich *C. glabrata* and mutator-poor *S. cerevisiae*. *C. deuterogattii* is not an obligate pathogen  
382 and can cycle between an environmental lifestyle and an infectious lifestyle as an “accidental  
383 pathogen” (26). Elevated mutation rates may be selected for by Red Queen interactions with a host,  
384 meaning that pathogens like *C. glabrata* that grow only in association with their hosts would  
385 experience higher mutation rates than facultative pathogens like *C. deuterogattii*, or effectively  
386 nonpathogenic yeasts like *S. cerevisiae*. In fact, a putative recurrent infection of *Cryptococcus*  
387 *neoformans* was recently demonstrated to contain nonsense mutations in *MSH2*, *MSH5*, and *RAD5*,  
388 predicted to result in a mutator phenotype (40).

389 An alternate hypothesis is that ploidy may play a role in the success of mutator strains. Both *C.*  
390 *deuterogattii* and *C. glabrata* exist primarily as haploids in nature, while *S. cerevisiae* is predominantly  
391 a diploid. Diploid strains are buffered from the effects of loss of function mutations like those observed  
392 in homopolymer runs in this study, which may reduce the supply of large effect beneficial mutations for  
393 mutator alleles to hitchhike upon in diploids. However, past work in *S. cerevisiae* suggests that diploids  
394 adapt more quickly in *msh2* mutant backgrounds, rather than less, suggesting that ploidy may play the  
395 opposite role, at least in *S. cerevisiae* (41).

396 Evolutionary theory predicts that the admixture provided by sex in a population nullifies the  
397 ability of mutator alleles to hitchhike to high frequency (17). Unlike obligately sexual animals, or  
398 asexual bacteria, fungi can reproduce both sexually and asexually, with the frequency of sex varying

399 substantially between different species. We previously described *C. deuterogattii* as a species  
400 characterized by long periods of mitotic clonal expansion and only intermittent sexual crosses (24). A  
401 contributing factor is likely the highly biased mating type distribution in *C. deuterogattii*, as the vast  
402 majority of *C. deuterogattii* isolates are *MAT* $\alpha$ , with only a handful of *MAT***a** isolates described globally  
403 (31). In *Cryptococcus deneoformans*, which shares a similar biased mating type distribution, this has  
404 resulted in the development of a unisexual  $\alpha$ - $\alpha$  sexual cycle, dispensing with the obligate need for a  
405 *MAT***a** partner (42). This unisexual cycle can result in both *de novo* variation, but also recombination  
406 and admixture at similar levels to that observed in typical bisexual crosses (38, 42, 43). However, no  
407 laboratory unisexual cycle has been observed in *C. deuterogattii* to this point. Consequently, as strains  
408 are introduced to new locales, they may need to survive and adapt via mitotic growth without sexual  
409 crosses for long periods of time. This could elevate linkage between mutator alleles and the beneficial  
410 mutations they elicit, but also eliminate the ability to separate those beneficial mutations from  
411 additional deleterious alleles.

412 We also showed that hypermutators can allow both inactivating mutations in genes, and  
413 reversion of those mutations to the wildtype. Mismatch repair-defective mutator strains are  
414 characterized by particularly high rates of slippage within homopolymer runs, and these occur at run  
415 lengths that are common within fungal genomes. This may indicate that eukaryotes may harbor  
416 contingency loci featuring homopolymer runs, like those observed in bacteria (44). Fungal contingency  
417 loci could be critical for responses to antifungal agents, both in the environment and the clinical setting.  
418 In addition, variation could be important in host-pathogen interactions as well. For example, in *S.*  
419 *cerevisiae*, tandem repeats are enriched within cell surface genes, which could enable alteration of  
420 antigenic diversity during pathogenic interactions (45). While these loci are unstable even in wildtype  
421 populations, defects in the MMR pathway could enhance this instability and result in increased

422 diversity. In *C. neoformans*, one mutator strain has been previously described in a lab-passaged strain  
423 notable for frequent mutations in the RAM pathway, which enables a dimorphic transition between  
424 pseudohyphal and yeast phase growth, although the molecular basis of the elevated mutation rate is  
425 unknown (35). This transition is highly important for survival in the face of environmental threats such  
426 as amoeba, but compromises pathways responsible for high temperature growth, suggesting that  
427 oscillation between RAM+ and RAM- states may allow populations to survive as conditions change.

428         In addition, we provided evidence that the VGIIa-like lineage was not a subvirulent progenitor  
429 of the Pacific Northwest outbreak, in contrast with previous hypotheses from two groups (24, 33).  
430 Rather, the VGIIa-like lineage may represent either an alternative pathway of adaptation or perhaps a  
431 preview of the evolutionary trajectory of the outbreak. The ability to grow at high temperatures is a  
432 critical component of virulence for fungal pathogens. However, many pathogenic fungi are thought to  
433 be “accidental” pathogens where virulence factors are selected for by other environmental factors. In  
434 this model, thermotolerance could be selected by high ambient temperatures in a non-host environment  
435 (46). Moving from a tropical/sub-tropical environment in South America to the more temperate climate  
436 of the Pacific Northwest may relieve this high temperature selection. Consequently, the loss of ability  
437 to grow under thermal stress observed in the VGIIa-like strains may be adaptive for the majority of  
438 their growth conditions in the environment, but also render them relatively avirulent in mammals. This  
439 could suggest that as the VGIIa outbreak strains continue to adapt to the Pacific Northwest, they will  
440 gradually lose virulence potential, making the outbreak self-limiting over time. Alternatively, the  
441 defects could simply reflect a decrease in viability caused by a long period of growth with an elevated  
442 mutation rate, resulting in mutational meltdown. The most severe temperature defect was observed in  
443 ICB107, a strain isolated from a patient in Brazil and also the strain with the largest number of  
444 mutations separating it from the VGIIa group, which would support the second hypothesis. These

445 strains may have been able to persist in the Pacific Northwest in spite of the high mutation load because  
446 of a bottleneck effect during their introduction.

447 Our original hypothesis was that the common variants that differentiated the VGIIa group from  
448 the progenitor of the VGIIa-like mutator group would explain the decline in virulence observed in the  
449 VGIIa-like strains (24, 31). However, the *msh2* mutation, the only predicted large effect mutation, has  
450 no obvious immediate effect on virulence in a murine inhalation model. This is interesting, at least in  
451 part, because *msh2* mutants of *C. neoformans* were previously reported to exhibit a modest growth  
452 advantage in mouse lungs in pooled signature tagged mutant experiments (47). This suggests that the  
453 mutator strains are better able to adapt to growth in the mouse lung, but not in a way that correlates  
454 directly with virulence in a dissemination and survival model of virulence. In addition, our results  
455 suggest that loss of virulence in the VGIIa-like strains may be a consequence of independent private  
456 mutations, i.e. each VGIIa-like strain is avirulent for its own reason. In previous work, CBS7750 and  
457 ICB107 have the most substantial virulence defects, while NIH444 has a more modest defect (31). This  
458 is congruent with the fact that NIH444 has the shortest divergence from the VGIIa clonal group, while  
459 CBS7750 and ICB107 have much longer branches, and is also congruent with the high temperature  
460 growth defects we observed.

461 Finally, we demonstrated that mutation spectrum analysis could be utilized within a phylogeny  
462 to infer the presence of a hypermutator allele through an increase in the proportion of indels within  
463 homopolymer runs. In bacteria, the hypermutator state is often transient and wildtype mismatch repair  
464 is often restored via horizontal gene transfer (4). This paradigm could also operate in fungi, with sexual  
465 recombination replacing direct DNA transfer. However, these events are difficult to detect if the  
466 hypermutator allele is purged from the population by selection after it is separated from its linked  
467 beneficial allele. The widespread availability of whole genome sequencing could now allow changes in

468 mutation spectrum to be used to detect episodic hypermutation throughout entire populations of  
469 microbes. We suspect that these episodes are common throughout the evolution of eukaryotic microbes  
470 and may be even more common among pathogenic microbes, reflecting their natural history as well as  
471 the result of Red Queen host-pathogen conflicts.

472 **Materials and Methods**

473 **Strains and media**

474 Strains used in this study are listed in table S1. Strains were routinely grown on YPD media at  
475 30°C and maintained in permanent glycerol stocks at -80°C. Strains marked with neomycin resistance  
476 were grown on YPD supplemented with G418.

477

478 **Genetic crosses and spore dissection**

479 To conduct crosses and isolate spores, NIH444 was cocultured with the R265a congenic strain  
480 (37) on solid V8 pH =5.0 medium in the dark for eight weeks. Basidiospores were isolated using a  
481 microdissection microscope equipped with a 25-µm needle (Cora Styles Needles 'N Blocks, Dissection  
482 Needle Kit) as previously described (48).

483

484 **Virulence assays**

485 Approximately eight week old A/J mice were anesthetized with phenobarbital via  
486 intraperitoneal injection and then were infected with  $5 \times 10^4$  cells from strains R265, RBB17, and  
487 RBB18 by intranasal inhalation. Ten animals per group were infected. Mice were monitored daily for  
488 signs of cryptococcal infection and sacrificed when exhibiting signs of clinical distress. The animal  
489 study was conducted in the Division of Laboratory Animal Resources (DLAR) facilities at Duke  
490 University Medical Center (DUMC). All of the animal work was performed according to the guidelines  
491 of NIH and Duke University Institutional Animal Care and Use Committee (IACUC) under protocol  
492 number A245-13-09.

493

494 **Gene disruption and strain construction**

495 Deletions of the *MSH2* gene were constructed using a standard overlap PCR approach as  
496 previously described (49). Briefly, 1 kb flanking regions of genomic DNA were amplified from both  
497 the 5' and 3' regions flanking the *MSH2* open reading frame in R265 and the selectable marker for *NEO*  
498 resistance was amplified from plasmid pJAF1. An overlap PCR was carried out to generate a full-  
499 length deletion cassette and R265 was transformed using biolistic transformation. Gene replacement  
500 was confirmed using in-gene, 5' junction, 3' junction, and spanning PCRs. Two independent  
501 transformations of independent overnight cultures of R265 were carried out to isolate independent  
502 mutants.

503 The R265 *NEO* resistance marked strain was constructed by transforming XbaI digested pJAF1  
504 plasmid into wild-type R265 by biolistics. Transformants were selected for on YPD containing  
505 neomycin. Transformants were checked for tandem insertions using primers JOHE40500/JOHE40501  
506 and a strain with only a single insertion was chosen and employed for the competition assay.

507

508 **Fluctuation assays**

509 Fluctuation assays were performed on either synthetic medium containing 5-FOA (1 g/L) at  
510 30°C or YPD supplemented with rapamycin (1 µg/mL) and FK506 (1 µg/mL) at 37°C. For each strain  
511 tested, ten independent 5 mL YPD liquid cultures were grown overnight at 30°C. Cultures were then  
512 split and either spread directly on selective media or diluted and spread on solid YPD to determine  
513 colony forming units. Resistant colonies and total colonies were counted and mutation rate was  
514 calculated using the Maximum Likelihood method as implemented via the FALCOR calculator (50).

515

516 **Co-culture competition assays**

517 Competition assays were carried out by growing independent liquid cultures overnight in 5 mL  
518 YPD. Cultures were then counted using a hemocytometer and 500,000 cells each of a tester neomycin  
519 resistant strain and a wildtype R265 culture were mixed in a 5 mL liquid YPD culture. Co-cultures  
520 were grown for 48 hours and then spread onto a YPD plate, such that individual colonies could be  
521 isolated. All colonies were picked (up to 60 and at least 5) and restruct to neomycin media to  
522 determine the proportion of colony forming units derived from each of the original strains in the  
523 competition.

524

525 **Genome sequencing and assembly**

526 DNA was isolated with the CTAB isolation protocol as previously described (51). Library  
527 construction and genome sequencing were carried out at the University of North Carolina Next  
528 Generation Sequencing Facility. Paired-end libraries with approximately 300-base inserts were  
529 constructed. A number of genome sequences were previously available (24, 33). The remaining were  
530 generated here and are deposited on the SRA under project accession no. PRJNA387047. All sequences  
531 were mapped to the V2 R265 reference genome (34). Alignment was performed using the short read  
532 component of the BWA aligner (52). Further processing was carried out using the Genome Analysis  
533 Toolkit (GATK) version 3.1-1 (53), including SAMtools (54) and Picard. SNPs and indels were called  
534 with UnifiedGenotyper from GATK, using the haploid setting. GATK's VariantAnnotator was used to  
535 define the homopolymer context of indels. VCFtools was used for filtering and extracting private  
536 variants (55). SnpEff was employed to determine the predicted impact of mutations (56).

537

538



539 **Inference of phylogeny**

540 Maximum parsimony phylogenies were constructed using MEGA6 (57) to analyze SNP matrices  
541 extracted from VCF format using a custom Perl script. SNPs and indels were placed on branches where  
542 they were predicted to change states using VCFtools (55) to extract the variants supporting each node.

543

544 **Acknowledgements**

545 Supported by NIH/NIAID R37 grant AI39115-19 and R01 grant AI50113-13 to JH. We thank Sheng  
546 Sun, Shelby Priest, Paul Magwene, and Tom Petes for helpful discussion and suggestions during the  
547 writing of this manuscript.

548

549

- 550 1. **Tenaillon O, Barrick JE, Ribick N, Deatherage DE, Blanchard JL, Dasgupta A, Wu GC,**  
551 **Wielgoss S, Cruveiller S, Médigue C, Schneider D, Lenski RE.** 2016. Tempo and mode of  
552 genome evolution in a 50,000-generation experiment. *Nature* **536**:165–170.
- 553 2. **Oliver A, Canton R, Campo P, Baquero F, Blazquez J.** 2000. High frequency of  
554 hypermutable *Pseudomonas aeruginosa* in cystic fibrosis lung infection. *Science* **288**:1251–  
555 1254.
- 556 3. **Wielgoss S, Barrick JE, Tenaillon O, Wisner MJ, Dittmar WJ, Cruveiller S, Chane-Woon-**  
557 **Ming B, Médigue C, Lenski RE, Schneider D.** 2013. Mutation rate dynamics in a bacterial  
558 population reflect tension between adaptation and genetic load. *Proc Natl Acad Sci* **110**:222–  
559 227.
- 560 4. **Denamur E, Lecoindre G, Darlu P, Tenaillon O, Acquaviva C, Sayada C, Sunjevaric I,**  
561 **Rothstein R, Elion J, Taddei F, Radman M, Matic I.** 2000. Evolutionary implications of the  
562 frequent horizontal transfer of mismatch repair genes. *Cell* **103**:711–721.
- 563 5. **LeClerc JE, Li B, Payne WL, Cebula TA.** 1996. High mutation frequencies among  
564 *Escherichia coli* and *Salmonella pathogens*. *Science* **274**:1208–1211.
- 565 6. **Himmelreich R, Plagens H, Hilbert H, Reiner B, Herrmann R.** 1997. Comparative analysis  
566 of the genomes of the bacteria *Mycoplasma pneumoniae* and *Mycoplasma genitalium*. *Nucleic*  
567 *Acids Res* **25**:701–712.
- 568 7. **Su SS, Modrich P.** 1986. *Escherichia coli* mutS-encoded protein binds to mismatched DNA  
569 base pairs. *Proc Natl Acad Sci* **83**:5057–5061.
- 570 8. **Au KG, Welsh K, Modrich P.** 1992. Initiation of methyl-directed mismatch repair. *J Biol Chem*  
571 **267**:12142–12148.
- 572 9. **Grilley M, Welsh KM, Su SS, Modrich P.** 1989. Isolation and characterization of the  
573 *Escherichia coli* mutL gene product. *J Biol Chem* **264**:1000–1004.
- 574 10. **Cox EC, Degnen GE, Scheppe ML.** 1972. Mutator gene studies in *Escherichia coli*: the *mutS*  
575 gene. *Genetics* **72**:551 LP-567.
- 576 11. **Reenan RA, Kolodner RD.** 1992. Isolation and characterization of two *Saccharomyces*  
577 *cerevisiae* genes encoding homologs of the bacterial HexA and MutS mismatch repair proteins.  
578 *Genetics* **132**:963–73.
- 579 12. **Strand M, Prolla TA, Liskay RM, Petes TD.** 1993. Destabilization of tracts of simple  
580 repetitive DNA in yeast by mutations affecting DNA mismatch repair. *Nature* **365**:274–6.

- 581 13. **Harfe BD, Jinks-Robertson S.** 2000. DNA mismatch repair and genetic instability. *Annu Rev*  
582 *Genet* **34**:359–399.
- 583 14. **Datta A, Hendrix M, Lipsitch M, Jinks-Robertson S.** 1997. Dual roles for DNA sequence  
584 identity and the mismatch repair system in the regulation of mitotic crossing-over in yeast. *Proc*  
585 *Natl Acad Sci U S A* **94**:9757–9762.
- 586 15. **Alani E, Reenan RA, Kolodner RD.** 1994. Interaction between mismatch repair and genetic  
587 recombination in *Saccharomyces cerevisiae*. *Genetics* **137**:19–39.
- 588 16. **Rayssiguier C, Thaler DS, Radman M.** 1989. The barrier to recombination between  
589 *Escherichia coli* and *Salmonella typhimurium* is disrupted in mismatch-repair mutants. *Nature*  
590 **342**:396–401.
- 591 17. **Tenaillon O, Le Nagard H, Godelle B, Taddei F.** 2000. Mutators and sex in bacteria: conflict  
592 between adaptive strategies. *Proc Natl Acad Sci U S A* **97**:10465–70.
- 593 18. **Heck JA, Argueso JL, Gemici Z, Reeves RG, Bernard A, Aquadro CF, Alani E.** 2006.  
594 Negative epistasis between natural variants of the *Saccharomyces cerevisiae* *MLH1* and *PMS1*  
595 genes results in a defect in mismatch repair. *Proc Natl Acad Sci U S A* **103**:3256–3261.
- 596 19. **Bui DT, Dine E, Anderson JB, Aquadro CF, Alani EE.** 2015. A genetic incompatibility  
597 accelerates adaptation in yeast. *PLOS Genet* **11**:e1005407.
- 598 20. **Bui DT, Friedrich A, Al-Sweel N, Liti G, Schacherer J, Aquadro CF, Alani E.** 2017.  
599 Mismatch repair incompatibilities in diverse yeast populations. *Genetics*.
- 600 21. **Skelly DA, Magwene PM, Meeks B, Murphy HA.** 2017. Known mutator alleles do not  
601 markedly increase mutation rate in clinical *Saccharomyces cerevisiae* strains. *Proceedings Biol*  
602 *Sci* **284**.
- 603 22. **Bielas JH, Loeb KR, Rubin BP, True LD, Loeb LA.** 2006. Human cancers express a mutator  
604 phenotype. *Proc Natl Acad Sci U S A* **103**:18238–18242.
- 605 23. **Healey KR, Zhao Y, Perez WB, Lockhart SR, Sobel JD, Farmakiotis D, Kontoyiannis DP,**  
606 **Sanglard D, Taj-Aldeen SJ, Alexander BD, Jimenez-Ortigosa C, Shor E, Perlin DS.** 2016.  
607 Prevalent mutator genotype identified in fungal pathogen *Candida glabrata* promotes multi-drug  
608 resistance. *Nat Commun* **7**:11128.
- 609 24. **Billmyre RB, Croll D, Li W, Mieczkowski P, Carter DA, Cuomo CA, Kronstad JW,**  
610 **Heitman J.** 2014. Highly recombinant VGII *Cryptococcus gattii* population develops clonal  
611 outbreak clusters through both sexual macroevolution and asexual microevolution. *MBio*  
612 **5**:e01494-14.

- 613 25. **Hagen F, Khayhan K, Theelen B, Kolecka A, Polacheck I, Sionov E, Falk R, Parnmen S,**  
614 **Lumbsch HT, Boekhout T.** 2015. Recognition of seven species in the *Cryptococcus*  
615 *gattii/Cryptococcus neoformans* species complex. *Fungal Genet Biol* **78**:16–48.
- 616 26. **Springer DJ, Phadke S, Billmyre B, Heitman J.** 2012. *Cryptococcus gattii*, no longer an  
617 accidental pathogen? *Curr Fungal Infect Rep* **6**:245–256.
- 618 27. **Feretzaki M, Billmyre RB, Clancey SA, Wang X, Heitman J.** 2016. Gene network  
619 polymorphism illuminates loss and retention of novel RNAi silencing components in the  
620 *Cryptococcus* pathogenic species complex. *PLoS Genet* **12**:e1005868.
- 621 28. **D’Souza CA, Kronstad JW, Taylor G, Warren R, Yuen M, Hu G, Jung WH, Sham A, Kidd**  
622 **SE, Tangen K, Lee N, Zeilmaker T, Sawkins J, McVicker G, Shah S, Gnerre S, Griggs A,**  
623 **Zeng Q, Bartlett K, Li W, Wang X, Heitman J, Stajich JE, Fraser JA, Meyer W, Carter D,**  
624 **Schein J, Krzywinski M, Kwon-Chung KJ, Varma A, Wang J, Brunham R, Fyfe M,**  
625 **Ouellette BFF, Siddiqui A, Marra M, Jones S, Holt R, Birren BW, Galagan JE, Cuomo**  
626 **CA.** 2011. Genome variation in *Cryptococcus gattii*, an emerging pathogen of  
627 immunocompetent hosts. *MBio* **2**:e00342-10.
- 628 29. **Kidd SE, Hagen F, Tschärke RL, Huynh M, Bartlett KH, Fyfe M, Macdougall L, Boekhout**  
629 **T, Kwon-Chung KJ, Meyer W.** 2004. A rare genotype of *Cryptococcus gattii* caused the  
630 cryptococcosis outbreak on Vancouver Island (British Columbia, Canada). *Proc Natl Acad Sci U*  
631 *S A* **101**:17258–63.
- 632 30. **Fraser JA, Giles SS, Wenink EC, Geunes-Boyer SG, Wright JR, Diezmann S, Allen A,**  
633 **Stajich JE, Dietrich FS, Perfect JR, Heitman J.** 2005. Same-sex mating and the origin of the  
634 Vancouver Island *Cryptococcus gattii* outbreak. *Nature* **437**:1360–4.
- 635 31. **Byrnes EJ, Li W, Lewit Y, Ma H, Voelz K, Ren P, Carter DA, Chaturvedi V, Bildfell RJ,**  
636 **May RC, Heitman J.** 2010. Emergence and pathogenicity of highly virulent *Cryptococcus*  
637 *gattii* genotypes in the northwest United States. *PLoS Pathog* **6**:e1000850.
- 638 32. **Hagen F, Ceresini PC, Polacheck I, Ma H, van Nieuwerburgh F, Gabaldón T, Kagan S,**  
639 **Pursall ER, Hoogveld HL, van Iersel LJJ, Klau GW, Kelk SM, Stougie L, Bartlett KH,**  
640 **Voelz K, Prysycz LP, Castañeda E, Lazera M, Meyer W, Deforce D, Meis JF, May RC,**  
641 **Klaassen CHW, Boekhout T.** 2013. Ancient dispersal of the human fungal pathogen  
642 *Cryptococcus gattii* from the Amazon rainforest. *PLoS One* **8**:e71148.
- 643 33. **Engelthaler DM, Hicks ND, Gillece JD, Roe CC, Schupp JM, Driebe EM, Gilgado F,**  
644 **Carriconde F, Trilles L, Firacative C, Ngamskulrungraj P, Castañeda E, Lazera MDS,**  
645 **Melhem MSC, Pérez-Bercoff A, Huttley G, Sorrell TC, Voelz K, May RC, Fisher MC,**  
646 **Thompson GR, Lockhart SR, Keim P, Meyer W.** 2014. *Cryptococcus gattii* in North

- 647 American Pacific Northwest: Whole-population genome analysis provides insights into species  
648 evolution and dispersal. *MBio* 5:e01464-14-.
- 649 34. **Farrer RA, Desjardins CA, Sakthikumar S, Gujja S, Saif S, Zeng Q, Chen Y, Voelz K,**  
650 **Heitman J, May RC, Fisher MC, Cuomo CA.** 2015. Genome evolution and innovation across  
651 the four major lineages of *Cryptococcus gattii*. *MBio* 6:e00868-15.
- 652 35. **Magditch DA, Liu T-B, Xue C, Idnurm A.** 2012. DNA mutations mediate microevolution  
653 between host-adapted forms of the pathogenic fungus *Cryptococcus neoformans*. *PLoS Pathog*  
654 **8**:e1002936.
- 655 36. **Kwon-Chung KJ, Varma A, Edman JC, Bennett JE.** 1992. Selection of *ura5* and *ura3*  
656 mutants from the two varieties of *Cryptococcus neoformans* on 5-fluoroorotic acid medium. *J*  
657 *Med Vet Mycol* **30**:61–69.
- 658 37. **Zhu P, Zhai B, Lin X, Idnurm A.** 2013. Congenic strains for genetic analysis of virulence traits  
659 in *Cryptococcus gattii*. *Infect Immun* **81**:2616–25.
- 660 38. **Ni M, Feretzaki M, Li W, Floyd-Averette A, Mieczkowski P, Dietrich FS, Heitman J.** 2013.  
661 Unisexual and heterosexual meiotic reproduction generate aneuploidy and phenotypic diversity  
662 de novo in the yeast *Cryptococcus neoformans*. *PLoS Biol* **11**:e1001653.
- 663 39. **Dellière S, Healey K, Gits-Muselli M, Carrara B, Barbaro A, Guigue N, Lecefel C,**  
664 **Touratier S, Desnos-Ollivier M, Perlin DS, Bretagne S, Alanio A.** 2016. Fluconazole and  
665 echinocandin resistance of *Candida glabrata* correlates better with antifungal drug exposure  
666 rather than with *MSH2* mutator genotype in a French cohort of patients harboring low rates of  
667 resistance. *Front Microbiol* 7:2038.
- 668 40. **Rhodes J, Beale MA, Vanhove M, Jarvis JN, Kannambath S, Simpson JA, Ryan A,**  
669 **Meintjes G, Harrison TS, Fisher MC, Bicanic T.** 2017. A population genomics approach to  
670 assessing the genetic basis of within-host microevolution underlying recurrent cryptococcal  
671 meningitis infection. *G3 (Bethesda)* 7:1165–1176.
- 672 41. **Thompson DA, Desai MM, Murray AW.** 2006. Ploidy controls the success of mutators and  
673 nature of mutations during budding yeast evolution. *Curr Biol* **16**:1581–1590.
- 674 42. **Lin X, Hull CM, Heitman J.** 2005. Sexual reproduction between partners of the same mating  
675 type in *Cryptococcus neoformans*. *Nature* **434**:1017–1021.
- 676 43. **Sun S, Billmyre RB, Mieczkowski PA, Heitman J.** 2014. Unisexual reproduction drives  
677 meiotic recombination and phenotypic and karyotypic plasticity in *Cryptococcus neoformans*.  
678 *PLOS Genet* **10**:e1004849.
- 679 44. **Moxon R, Bayliss C, Hood D.** 2006. Bacterial contingency loci: the role of simple sequence

- 680 DNA repeats in bacterial adaptation. *Annu Rev Genet* **40**:307–333.
- 681 45. **Verstrepen KJ, Jansen A, Lewitter F, Fink GR.** 2005. Intragenic tandem repeats generate  
682 functional variability. *Nat Genet* **37**:986–90.
- 683 46. **Casadevall A, Steenbergen JN, Nosanchuk JD.** 2003. “Ready made” virulence and “dual use”  
684 virulence factors in pathogenic environmental fungi — the *Cryptococcus neoformans* paradigm.  
685 *Curr Opin Microbiol* **6**:332–337.
- 686 47. **Liu OW, Chun CD, Chow ED, Chen C, Madhani HD, Noble SM.** 2008. Systematic genetic  
687 analysis of virulence in the human fungal pathogen *Cryptococcus neoformans*. *Cell* **135**:174–88.
- 688 48. **Hsueh Y-P, Idnurm A, Heitman J.** 2006. Recombination hotspots flank the *Cryptococcus*  
689 mating-type locus: implications for the evolution of a fungal sex chromosome. *PLoS Genet*  
690 **2**:e184.
- 691 49. **Davidson RC, Cruz MC, Sia RA, Allen B, Alspaugh JA, Heitman J.** 2000. Gene disruption  
692 by biolistic transformation in serotype D strains of *Cryptococcus neoformans*. *Fungal Genet Biol*  
693 **29**:38–48.
- 694 50. **Hall BM, Ma C-X, Liang P, Singh KK.** 2009. Fluctuation AnaLysis CalculatOR: a web tool  
695 for the determination of mutation rate using Luria–Delbrück fluctuation analysis. *Bioinformatics*  
696 **25**:1564–1565.
- 697 51. **Pitkin JW, Panaccione DG, Walton JD.** 1996. A putative cyclic peptide efflux pump encoded  
698 by the *TOXA* gene of the plant-pathogenic fungus *Cochliobolus carbonum*. *Microbiology*  
699 **142**:1557–1565.
- 700 52. **Li H, Durbin R.** 2009. Fast and accurate short read alignment with Burrows-Wheeler transform.  
701 *Bioinformatics* **25**:1754–60.
- 702 53. **McKenna A, Hanna M, Banks E, Sivachenko A, Cibulskis K, Kernytzky A, Garimella K,  
703 Altshuler D, Gabriel S, Daly M, DePristo MA.** 2010. The Genome Analysis Toolkit: A  
704 MapReduce framework for analyzing next-generation DNA sequencing data. *Genome Res*  
705 **20**:1297–303.
- 706 54. **Li H, Handsaker B, Wysoker A, Fennell T, Ruan J, Homer N, Marth G, Abecasis G,  
707 Durbin R.** 2009. The Sequence Alignment/Map format and SAMtools. *Bioinformatics* **25**:2078–  
708 9.
- 709 55. **Danecek P, Auton A, Abecasis G, Albers CA, Banks E, DePristo MA, Handsaker RE,  
710 Lunter G, Marth GT, Sherry ST, McVean G, Durbin R.** 2011. The variant call format and  
711 VCFtools. *Bioinformatics* **27**:2156–8.

- 712 56. **Cingolani P, Platts A, Wang LL, Coon M, Nguyen T, Wang L, Land SJ, Lu X, Ruden DM.**  
713 2012. A program for annotating and predicting the effects of single nucleotide polymorphisms,  
714 SnpEff: SNPs in the genome of *Drosophila melanogaster* strain w1118; iso-2; iso-3. *Fly (Austin)*  
715 **6:80–92.**
- 716 57. **Tamura K, Stecher G, Peterson D, Filipski A, Kumar S.** 2013. MEGA6: Molecular  
717 Evolutionary Genetics Analysis version 6.0. *Mol Biol Evol* **30:2725–2729.**
- 718 58. **Springer DJ, Ren P, Raina R, Dong Y, Behr MJ, McEwen BF, Bowser SS, Samsonoff WA,**  
719 **Chaturvedi S, Chaturvedi V.** 2010. Extracellular fibrils of pathogenic yeast *Cryptococcus*  
720 *gattii* are important for ecological niche, murine virulence and human neutrophil interactions.  
721 *PLoS One* **5:e10978.**
- 722

723 **Figure legends**

724 **Figure 1. VGIIa-like isolates harbor a frameshift resulting in a predicted nonfunctional protein.**

725 A) The VGIIa-like clade is part of the clonal radiation that includes the Pacific Northwest Outbreak. All  
726 three isolates are characterized by a frameshift in the *MSH2* gene at position 131. B) Sanger sequencing  
727 of the *MSH2* gene confirms that NIH444 and CBS7750 have both undergone deletion of a single T  
728 within the coding region of *MSH2*, while the VGIIa R265 strain and the outgroup VGIIb strain have  
729 not. C) This deletion results in a frameshift beginning in the first functional domain of *MSH2* and an  
730 early premature stop. This truncated protein is predicted to be non-functional.

731

732 **Figure 2. *msh2* mutants are hypermutators.**

733 A) A fluctuation assay for resistance to 5-FOA was carried out for both wildtype VGIIa strains (R265  
734 and EJB17) and hypermutator VGIIa-like strains (NIH444, EJB17, and ICB107), as well as an  
735 outgroup VGIIb (R272) strain. Resistance rates were normalized to the rate observed in R265. The  
736 VGIIa-like strains demonstrate an increase in mutation rate. Data shown are the mean of ten replicates  
737 with 95% confidence interval. B) The molecular basis of resistance was determined for 5-FOA  
738 resistance at the *URA5* locus. All isolates tested demonstrated predominantly substitutions as the  
739 molecular basis of resistance.

740

741 **Figure 3. Hypermutators are characterized by high homopolymer instability.**

742 A) Percentage of transitions and transversions among SNPs private to R272, an outgroup, and ICB107,  
743 a hypermutator, are shown. Transitions are more common in both strains, while one type of transition is  
744 modestly reduced in the hypermutator. B) All private mutations within R272 and ICB107 were  
745 characterized either as SNPs, indels, or homopolymer indels. The cutoff used to distinguish a



746 homopolymer indel was longer than 4 bases. ICB107 had a substantial increase in homopolymer run  
747 shifts. C) Frequency of indels within all homopolymers longer than 1 base from the private ICB107  
748 mutations are shown in blue. All genes from the *C. deuterogattii* transcriptome were grouped by  
749 frequency of the longest homopolymer run within the coding region of that gene and shown in red.  
750 *URA5* only has a run of 4 bases, while *FRR1*, which encodes FKBP12, the target of FK506 and  
751 rapamycin, has a run of 7 bases.

752

753 **Figure 4. A homopolymer run within the *FRR1* gene allows rapid inactivation and resistance to**  
754 **FK506 and rapamycin.**

755 A) Swab assays of the VGIIa and VGIIa-like strains were conducted to determine whether VGIIa-like  
756 stains develop resistance to FK506 and rapamycin at 37°C at an elevated rate compared to VGIIa.  
757 NIH444 demonstrated a large increase in resistance rate, while CBS7750 was completely resistant. B)  
758 The resistance in CBS7750 is attributable to a single base deletion within the coding 7C run in the  
759 *FRR1* gene that has been fixed in this strain. C) Fluctuation assays for NIH444 and R265 show that the  
760 hypermutator conferred a greater than 100-fold increase in mutation rate compared to the wildtype  
761 VGIIa strain. Data shown are the mean of ten replicates with 95% confidence intervals and are  
762 normalized to the rate in R265. D) Analysis of the molecular basis of resistance shows that  
763 substitutions are still the predominant mechanism for resistance in R265, but in the hypermutator strain  
764 single base additions and single base deletions within the homopolymer run are responsible for the vast  
765 majority of resistance.

766

767 **Figure 5. The hypermutator phenotype is linked to the frameshift in *MSH2*.**

768 A) Progeny from a cross between NIH444 and R265 show co-segregation of the *msh2* del131 allele

769 with the hypermutator phenotype in all except two cases. B) Whole genome depth of coverage plots  
770 show that scaffolds five and six are aneuploid in spores #4 and #5, respectively. C) Temperature  
771 sensitivity assay for the incongruent spores before and after serial passaging at 37°C. D) After passage  
772 at 37°C, the non-congruent spores now properly demonstrate linkage with the *msh2* del131 allele. E)  
773 Whole genome sequencing of NIH444 x R265a progeny, with variant regions indicated as reference in  
774 blue or alternate in red. The boxed region indicates a SNP in close linkage to the *msh2* del131 allele. F)  
775 Two independent *de novo* deletions of *MSH2* via biolistic transformation demonstrate elevated  
776 mutation rates in an FK506/rapamycin swabbing assay at 37°C. G) Fluctuation assays for R265,  
777 NIH444, and two independent deletions of *msh2* in R265 show that the hypermutator phenotype is  
778 recapitulated in the null mutants. Data shown are the mean of ten replicates with 95% confidence  
779 intervals and are normalized to the rate observed in R265.

780

781 **Figure 6. Hypermutation allows inactivation and reactivation of adenine biosynthetic pathway.**

782 A) A spontaneous red colony was isolated from the *de novo msh2* deletion (RBB18). B) This colony  
783 (RBB22) demonstrated adenine auxotrophy, suggesting that it was an *ade2* mutant. C) Sequencing of  
784 the *ADE2* locus confirmed that the original colony was an *ade2* mutant. In addition, two red (RBB25  
785 and RBB26) and two white derivatives (RBB23 and RBB24) were tested. One white derivative had  
786 reverted the original mutation (RBB23), while the second had eliminated production of the red  
787 intermediate but had not reverted the original *ade2* mutation (RBB24). D) One revertant colony  
788 (RBB23) demonstrated adenine prototrophy, while the other (RBB24) remained an auxotroph despite  
789 losing the red pigmentation. E) An assay to test direct reversion frequency versus secondary mutation  
790 to eliminate the red toxic intermediate demonstrated that the most common mutations were direct  
791 reversions and restoration of adenine prototrophy.

792

793 **Figure 7. Hypermutation does not have immediate virulence defects but may potentiate long term**  
794 **deficits.**

795 A) Virulence tested in the murine inhalation model was not strongly affected by deletion of the *MSH2*  
796 gene. B) All three VGIIa-like strains demonstrated defects in high temperature growth via a spot  
797 dilution assay in comparison with the VGIIa R265 strain and the VGIIb R272 strain as an outgroup.  
798 Strains with longer branches exhibited larger high temperature growth defects. C) Competition  
799 experiments between a tester strain with the neomycin resistance marker and the wildtype R265 strain.  
800 (Strain used: SEC501, RBB17, RBB18). Original cultures were mixed in a 1:1 ratio and then grown  
801 overnight in liquid YPD. Both hypermutators showed a modest growth defect at 30°C and 37°C but a  
802 dramatic growth advantage in the high stress FK506/rapamycin 37°C condition. Boxplots show  
803 minimum, first quartile, median, third quartile, and maximum values. Points represent the results from  
804 six individual replicates summarized by the box plot. The *NEO* vs WT competition is shown in gray,  
805 while the two *msh2Δ::NEO* competitions are shown in dark and light blue.

806

807 **Figure 8. The VGIIa-like hypermutator is derived and not ancestral to the Pacific Northwest**  
808 **outbreak.**

809 A maximum parsimony phylogeny of the VGIIa group with the VGIIb R272 genome as an outgroup  
810 demonstrates that the VGIIa-like group is a branch parallel to the VGIIa group. To test for the presence  
811 of a defect in MMR throughout the tree, the mutation spectrum was examined on each branch. High  
812 rates of homopolymer run shifts were observed throughout the VGIIa-like group, but no evidence was  
813 apparent at branch A). Instead it appears that the hypermutator first arose on branch B).

814

815 **Supplemental Figure 1. Passaged spore progeny demonstrate linkage between *msh2del131* allele**  
816 **and mutator phenotype.**

817 Four independent overnight cultures of spore progeny passaged at 37°C to select against aneuploidies  
818 that confer temperature sensitivity were struck on YPD media containing FK506 and rapamycin at  
819 37°C. All fourteen passaged spore progeny demonstrated behavior predicted by the state of the *MSH2*  
820 locus for the majority of the four samples tested. Spores #4 and #5 and controls are depicted in Figure  
821 5.

822

823 **Supplemental Figure 2. Reversion of *ade2* mutants primarily occurs through repair of *ADE2*.**

824 42 white colonies were selected as independent revertants from a red *ade2* mutant (RBB22). Colonies  
825 were struck to both YPD and YNB to test for auxotrophy indicative of either direct reversion or a  
826 second site mutation upstream of *ade2* in the adenine biosynthetic pathway.

827

828 Supplemental Table 1: Strains used in this study.

| <b>Strain</b> | <b>Genotype</b>                                        | <b>Source/Reference</b> |
|---------------|--------------------------------------------------------|-------------------------|
| R265          | VGIIa                                                  | (29)                    |
| EJB17         | VGIIa                                                  | (31)                    |
| R272          | VGIIb                                                  | (30)                    |
| NIH444        | VGIIa-like, <i>msh2del131</i>                          | (30)                    |
| NIH444(v)     | VGIIa-like, <i>msh2del131</i>                          | (58)                    |
| CBS7750       | VGIIa-like, <i>msh2del131</i>                          | (30)                    |
| ICB107        | VGIIa-like, <i>msh2del131</i>                          | (30)                    |
| RBB17         | R265, <i>msh2Δ::NEO</i>                                | This study              |
| RBB18         | R265, <i>msh2Δ::NEO</i>                                | This study              |
| RBB22         | RBB18, <i>msh2Δ::NEO</i> , <i>ade2</i>                 | This study              |
| RBB23         | RBB22, <i>msh2Δ::NEO</i> , white, <i>ADE2</i>          | This study              |
| RBB24         | RBB22, <i>msh2Δ::NEO</i> , white, <i>ade2</i>          | This study              |
| RBB25         | RBB22, <i>msh2Δ::NEO</i> , red, <i>ade2</i>            | This study              |
| RBB26         | RBB22, <i>msh2Δ::NEO</i> , red, <i>ade2</i>            | This study              |
| ECt1          | XL280 <i>ade2::NEO</i>                                 | This study              |
| R265a         | R265, <i>MATa</i>                                      | (37)                    |
| SEC016        | NIH444xR265a spore #1, <i>msh2del131</i>               | This study              |
| SEC017        | NIH444xR265a spore #2                                  | This study              |
| SEC018        | NIH444xR265a spore #3, <i>MATa</i> , <i>msh2del131</i> | This study              |
| SEC019        | NIH444xR265a spore #4, <i>MATa</i> , <i>msh2del131</i> | This study              |
| SEC020        | NIH444xR265a spore #5, <i>msh2del131</i>               | This study              |
| SEC021        | NIH444xR265a spore #6, <i>MATa</i> , <i>msh2del131</i> | This study              |
| SEC022        | NIH444xR265a spore #7                                  | This study              |
| SEC023        | NIH444xR265a spore #8                                  | This study              |
| SEC024        | NIH444xR265a spore #9, <i>MATa</i>                     | This study              |
| SEC025        | NIH444xR265a spore #10, <i>MATa</i>                    | This study              |
| SEC026        | NIH444xR265a spore #11                                 | This study              |
| SEC027        | NIH444xR265a spore #12, <i>MATa</i>                    | This study              |
| SEC028        | NIH444xR265a spore #13, <i>msh2del131</i>              | This study              |

Research Article

Final 5/23/17

|        |                                                         |            |
|--------|---------------------------------------------------------|------------|
| SEC029 | NIH444xR265a spore #14, <i>MATa</i> , <i>msh2del131</i> | This study |
| SEC501 | R265, <i>NEO</i>                                        | This study |
| SEC559 | SEC016, passaged 4 times at 37°C                        | This study |
| SEC560 | SEC017, passaged 4 times at 37°C                        | This study |
| SEC561 | SEC018, passaged 4 times at 37°C                        | This study |
| SEC562 | SEC019, passaged 4 times at 37°C                        | This study |
| SEC563 | SEC020, passaged 4 times at 37°C                        | This study |
| SEC564 | SEC021, passaged 4 times at 37°C                        | This study |
| SEC565 | SEC022, passaged 4 times at 37°C                        | This study |
| SEC566 | SEC023, passaged 4 times at 37°C                        | This study |
| SEC567 | SEC024, passaged 4 times at 37°C                        | This study |
| SEC568 | SEC025, passaged 4 times at 37°C                        | This study |
| SEC569 | SEC026, passaged 4 times at 37°C                        | This study |
| SEC570 | SEC027, passaged 4 times at 37°C                        | This study |
| SEC571 | SEC028, passaged 4 times at 37°C                        | This study |
| SEC572 | SEC029, passaged 4 times at 37°C                        | This study |
| SEC573 | R265a, passaged 4 times at 37°C                         | This study |
| SEC574 | NIH444, passaged 4 times at 37°C                        | This study |
| SEC575 | SEC562, passaged 5 additional times at 37°C             | This study |

---

829

830

831 Supplemental Table 2. Oligonucleotides used in this study.

| <b>Primer</b>   | <b>Sequence (5' to 3')</b>                 | <b>Comment</b>                         |
|-----------------|--------------------------------------------|----------------------------------------|
| M13F            | GTAAAACGACGGCCAG                           | universal oligo                        |
| M13R            | CAGGAAACAGCTATGAC                          | universal oligo                        |
| JOHE41021/BB265 | GAGCGTATTTCTGAAGCAGG                       | <i>MSH2</i> 5' F deletion              |
| JOHE41022/BB266 | CATCTGGCCATAGTGACGC                        | <i>MSH2</i> 5' F nested deletion       |
| JOHE41023/BB267 | CTGGCCGTCGTTTTACAAAGACGA<br>ACTTCATTATGAGC | <i>MSH2</i> 5' R deletion              |
| JOHE41024/BB268 | GTCATAGCTGTTTCCTGCCTTGACA<br>AGTTTGATCGC   | <i>MSH2</i> 3' F deletion              |
| JOHE41025/BB269 | CGACATTTGATGAACCTTCACC                     | <i>MSH2</i> 3' R deletion              |
| JOHE41026/BB270 | GTCATATACCCGGCACACTTCG                     | <i>MSH2</i> 3' R nested deletion       |
| JOHE41027/BB271 | CCGAGAAAGCAGAAGTGACC                       | <i>MSH2</i> F sequencing               |
| JOHE41245/BB275 | CCAAGCAGATGCGTATCG                         | <i>MSH2</i> R sequencing               |
| JOHE42336/BB280 | CCTTCCAACAGGCCAAAGTGG                      | <i>ADE2</i> 5' F for sequencing        |
| JOHE42337/BB281 | GGTAATTTGTGCCTGACTGG                       | <i>ADE2</i> 5' F nested for sequencing |
| JOHE42338/BB282 | GCGAAGTCCAGCCAAGTCC                        | <i>ADE2</i> F ~400 for sequencing      |
| JOHE42339/BB283 | GGCTGAGAAGGCAGTCGG                         | <i>ADE2</i> F ~800 for sequencing      |
| JOHE42340/BB284 | GGATTGATCTCATTGCACCTCC                     | <i>ADE2</i> F ~1300 for sequencing     |
| JOHE42341/BB285 | CCGACATCAAGCCAACAGG                        | <i>ADE2</i> 3' R for sequencing        |
| JOHE42342/BB286 | CGTGCTGCAGATGCTGG                          | <i>ADE2</i> 3' R nested for sequencing |
| JOHE42343/BB287 | CCACGCCGTCTAGTACACTGG                      | <i>ADE2</i> R ~1600 for sequencing     |
| JOHE42344/BB288 | GCAGCACCAGAAACAGTGAGAGC                    | <i>ADE2</i> R ~1100 for sequencing     |
| JOHE42345/BB289 | CCCAACCTTCAGCATAAAGAGG                     | <i>ADE2</i> R ~600 for sequencing      |
| JOHE26938/BB14  | GTCTTCCCAAGCCCTCGACTC                      | <i>URA5</i> 5' F for sequencing        |
| JOHE26939/BB15  | CCGGTGAGCCATATCGCAGC                       | <i>URA5</i> 5' F nested for sequencing |
| JOHE26941/BB17  | CCTGTACTTCCTGACCTCTCG                      | <i>URA5</i> 3' R for sequencing        |
| JOHE26942/BB18  | CCCCTTTCCGGAGCCTTCC                        | <i>URA5</i> 3' R nested for sequencing |
| JOHE40363/BB257 | GTGTTTGGACGAGCAGTCGG                       | <i>FRR1</i> 3' R for sequencing        |
| JOHE40364/BB258 | GCAGCAATGCAATCCTGG                         | <i>FRR1</i> 3' R nested for sequencing |
| JOHE40365/BB259 | GGTACAGGGCGTTGGACC                         | <i>FRR1</i> 5' F for sequencing        |
| JOHE40366/BB260 | CGACCTGCAATAGTTTCCC                        | <i>FRR1</i> 5' F nested for sequencing |

Research Article

Final 5/23/17

|                  |                       |                                  |
|------------------|-----------------------|----------------------------------|
| JOHE40500/SEC129 | GGGATGACAGGAGATCCTGC  | NEO 3' R for insert confirmation |
| JOHE40501/SEC130 | GCAACAATCCATCCGTGCTGG | NEO 5' F for insert confirmation |

---

832



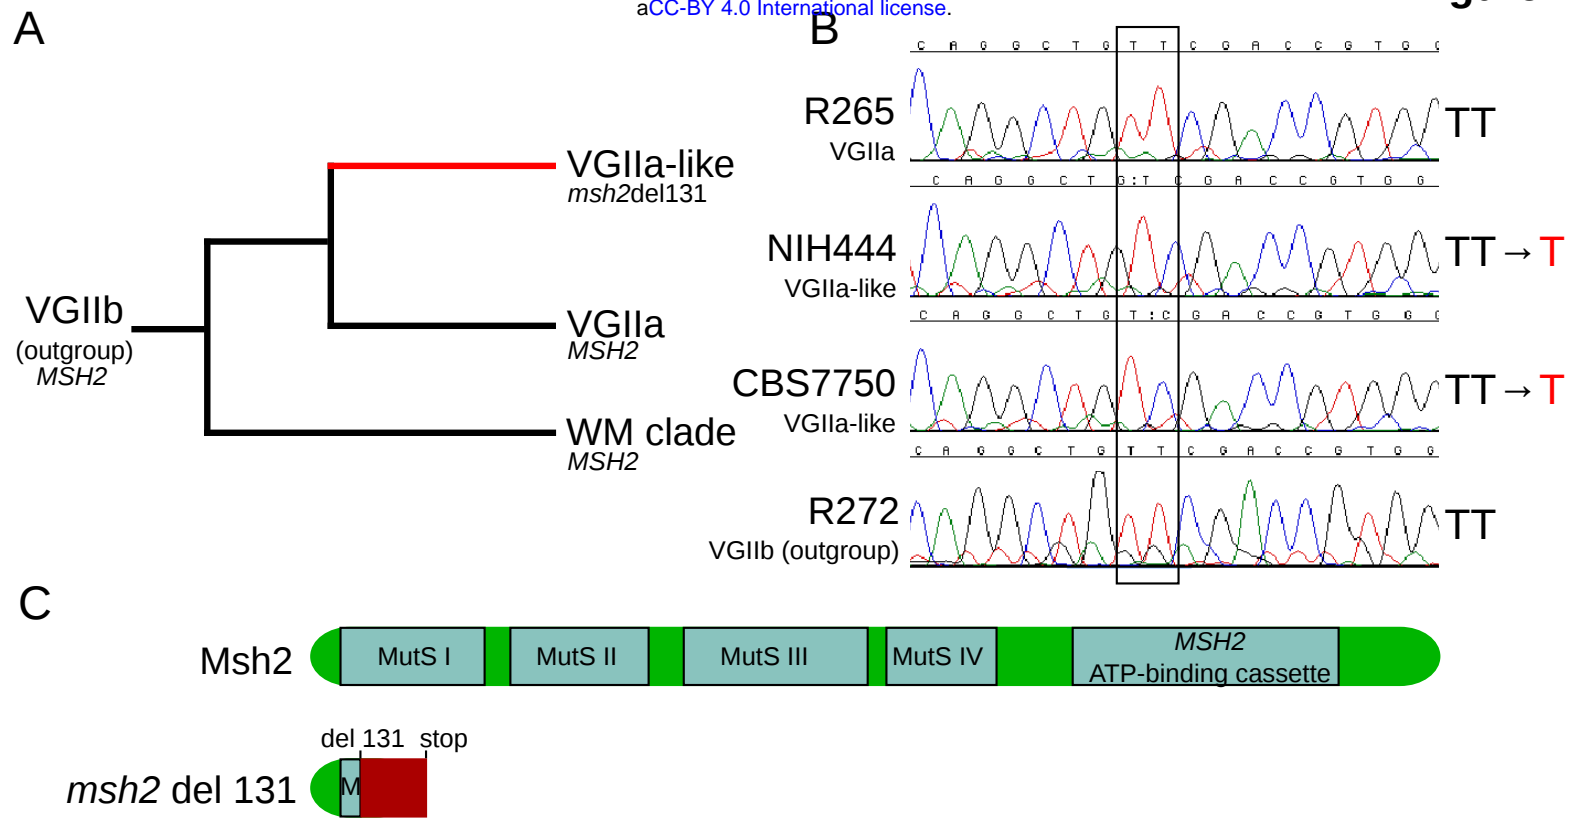

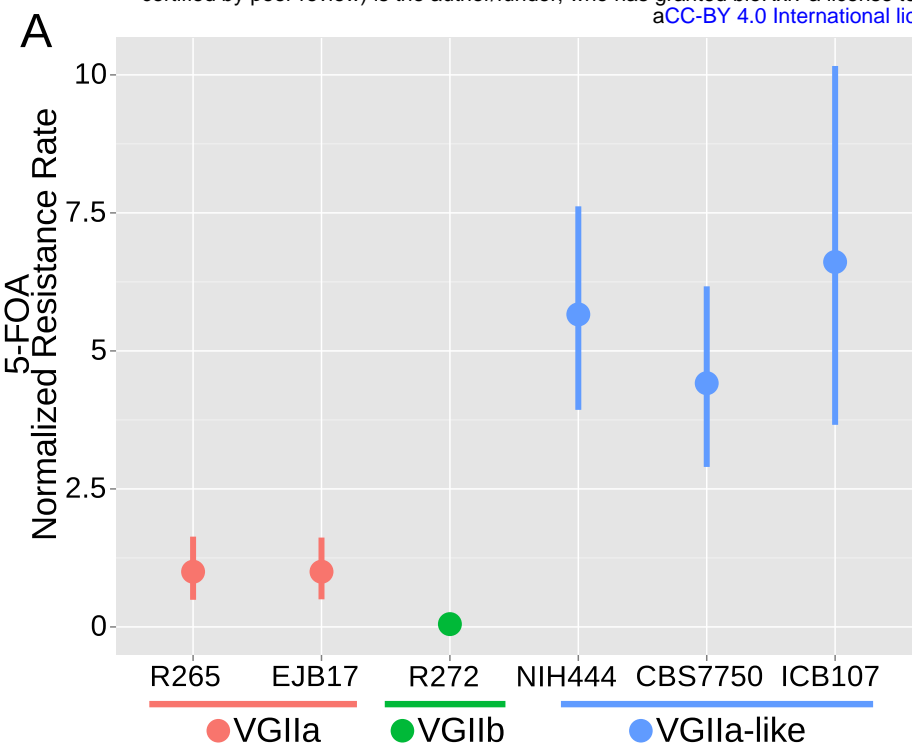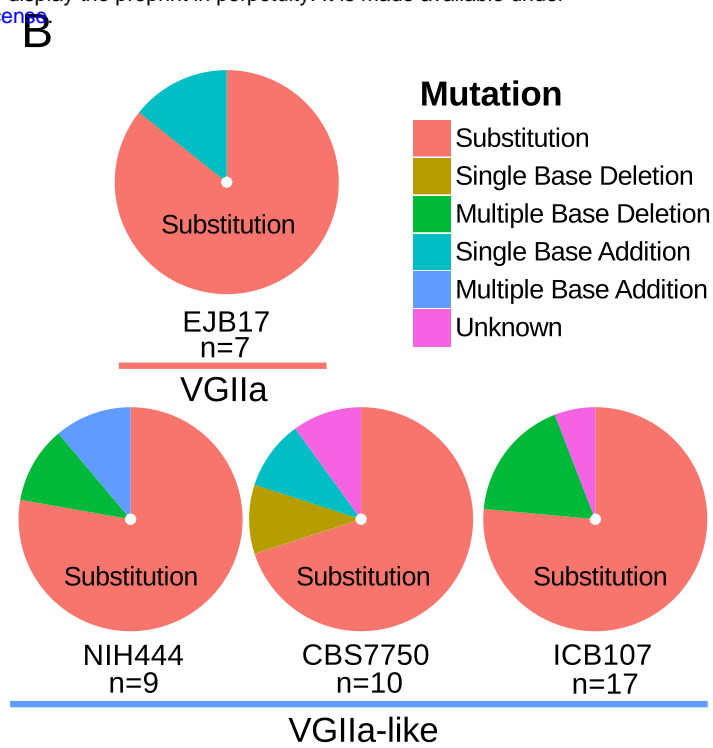

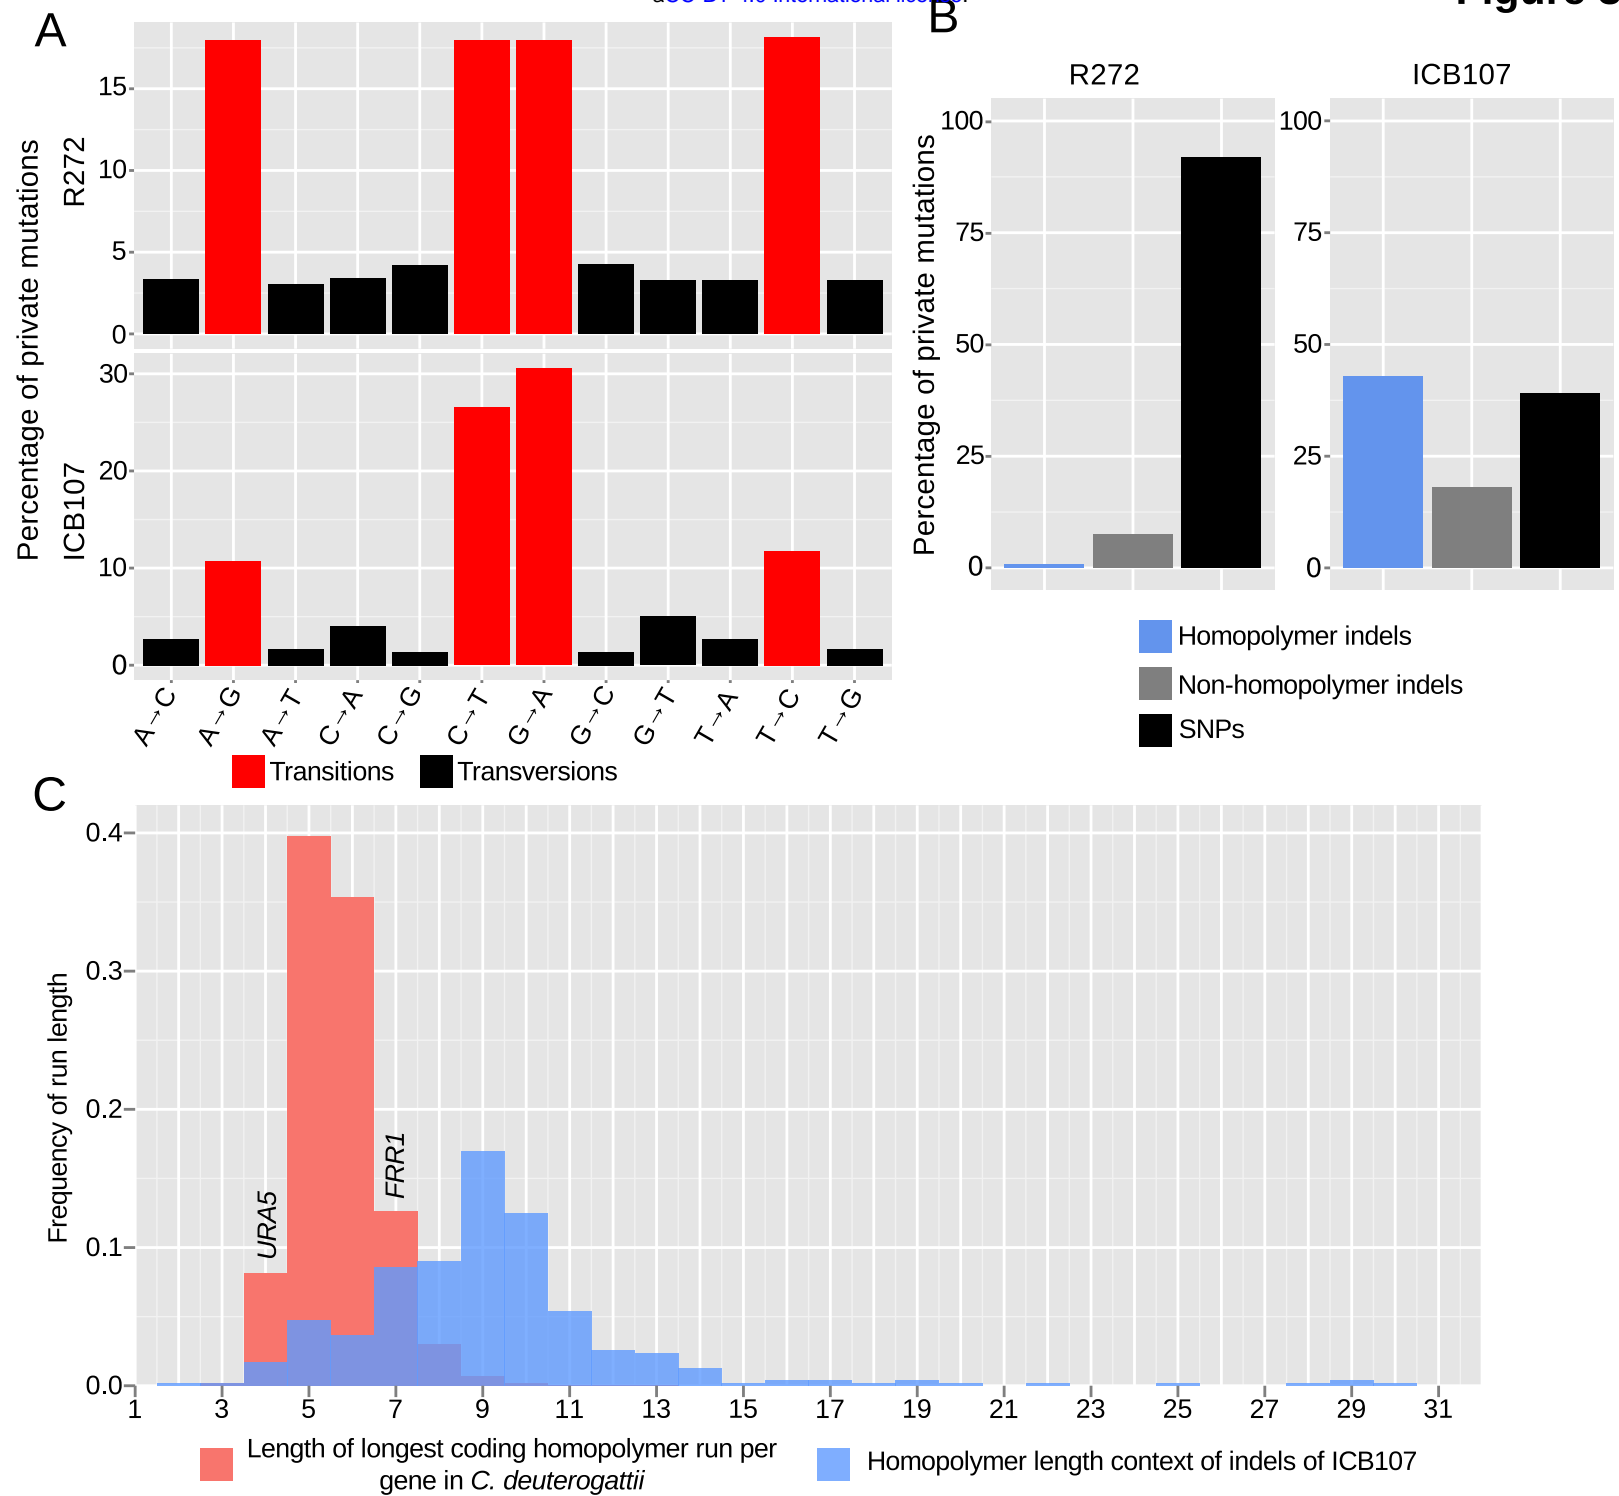

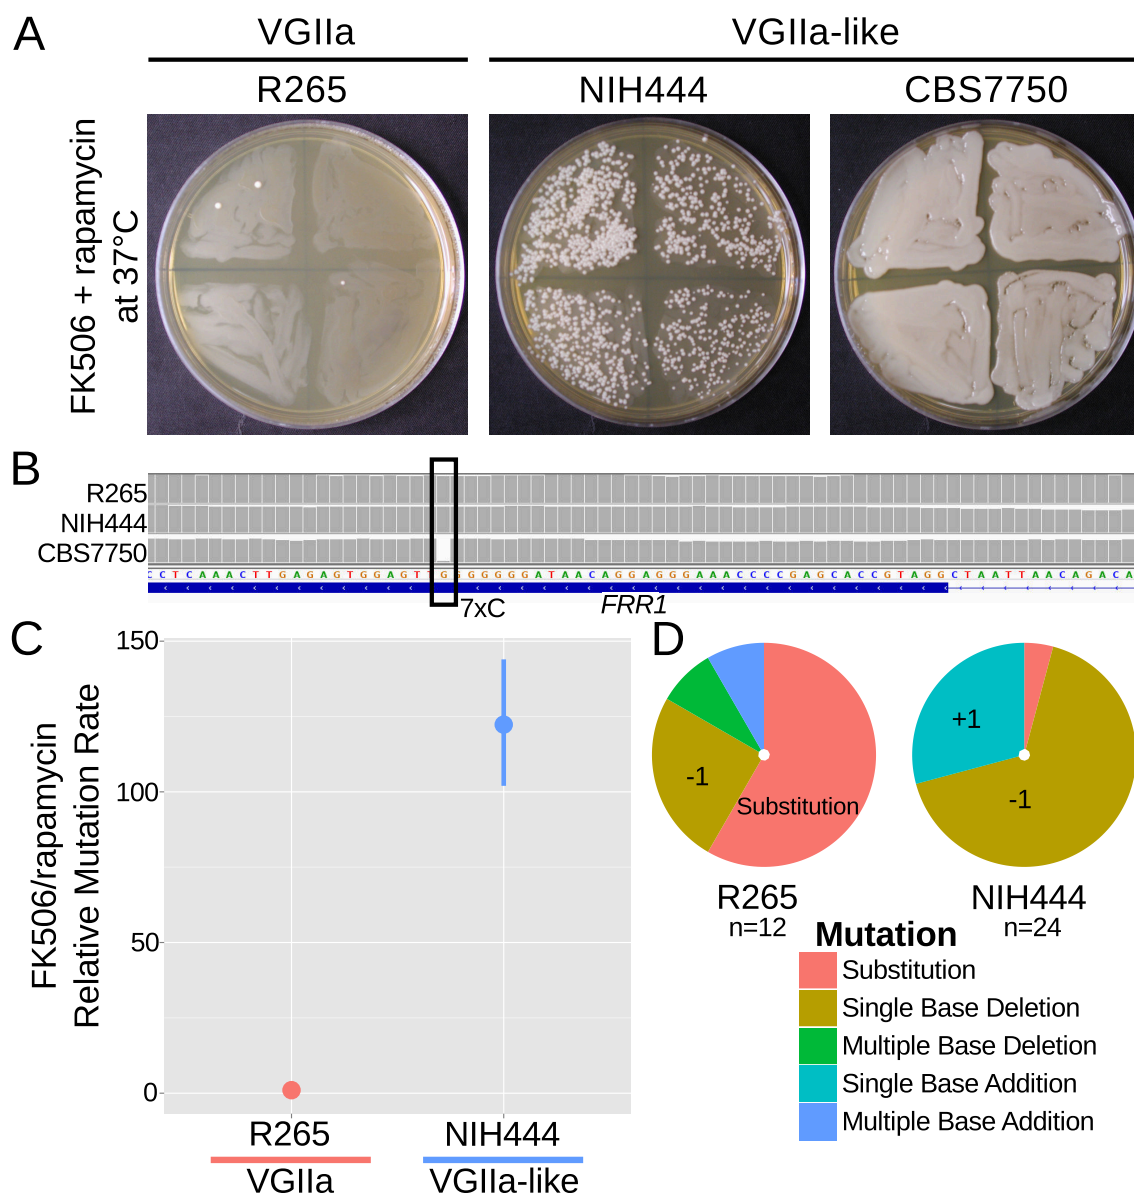

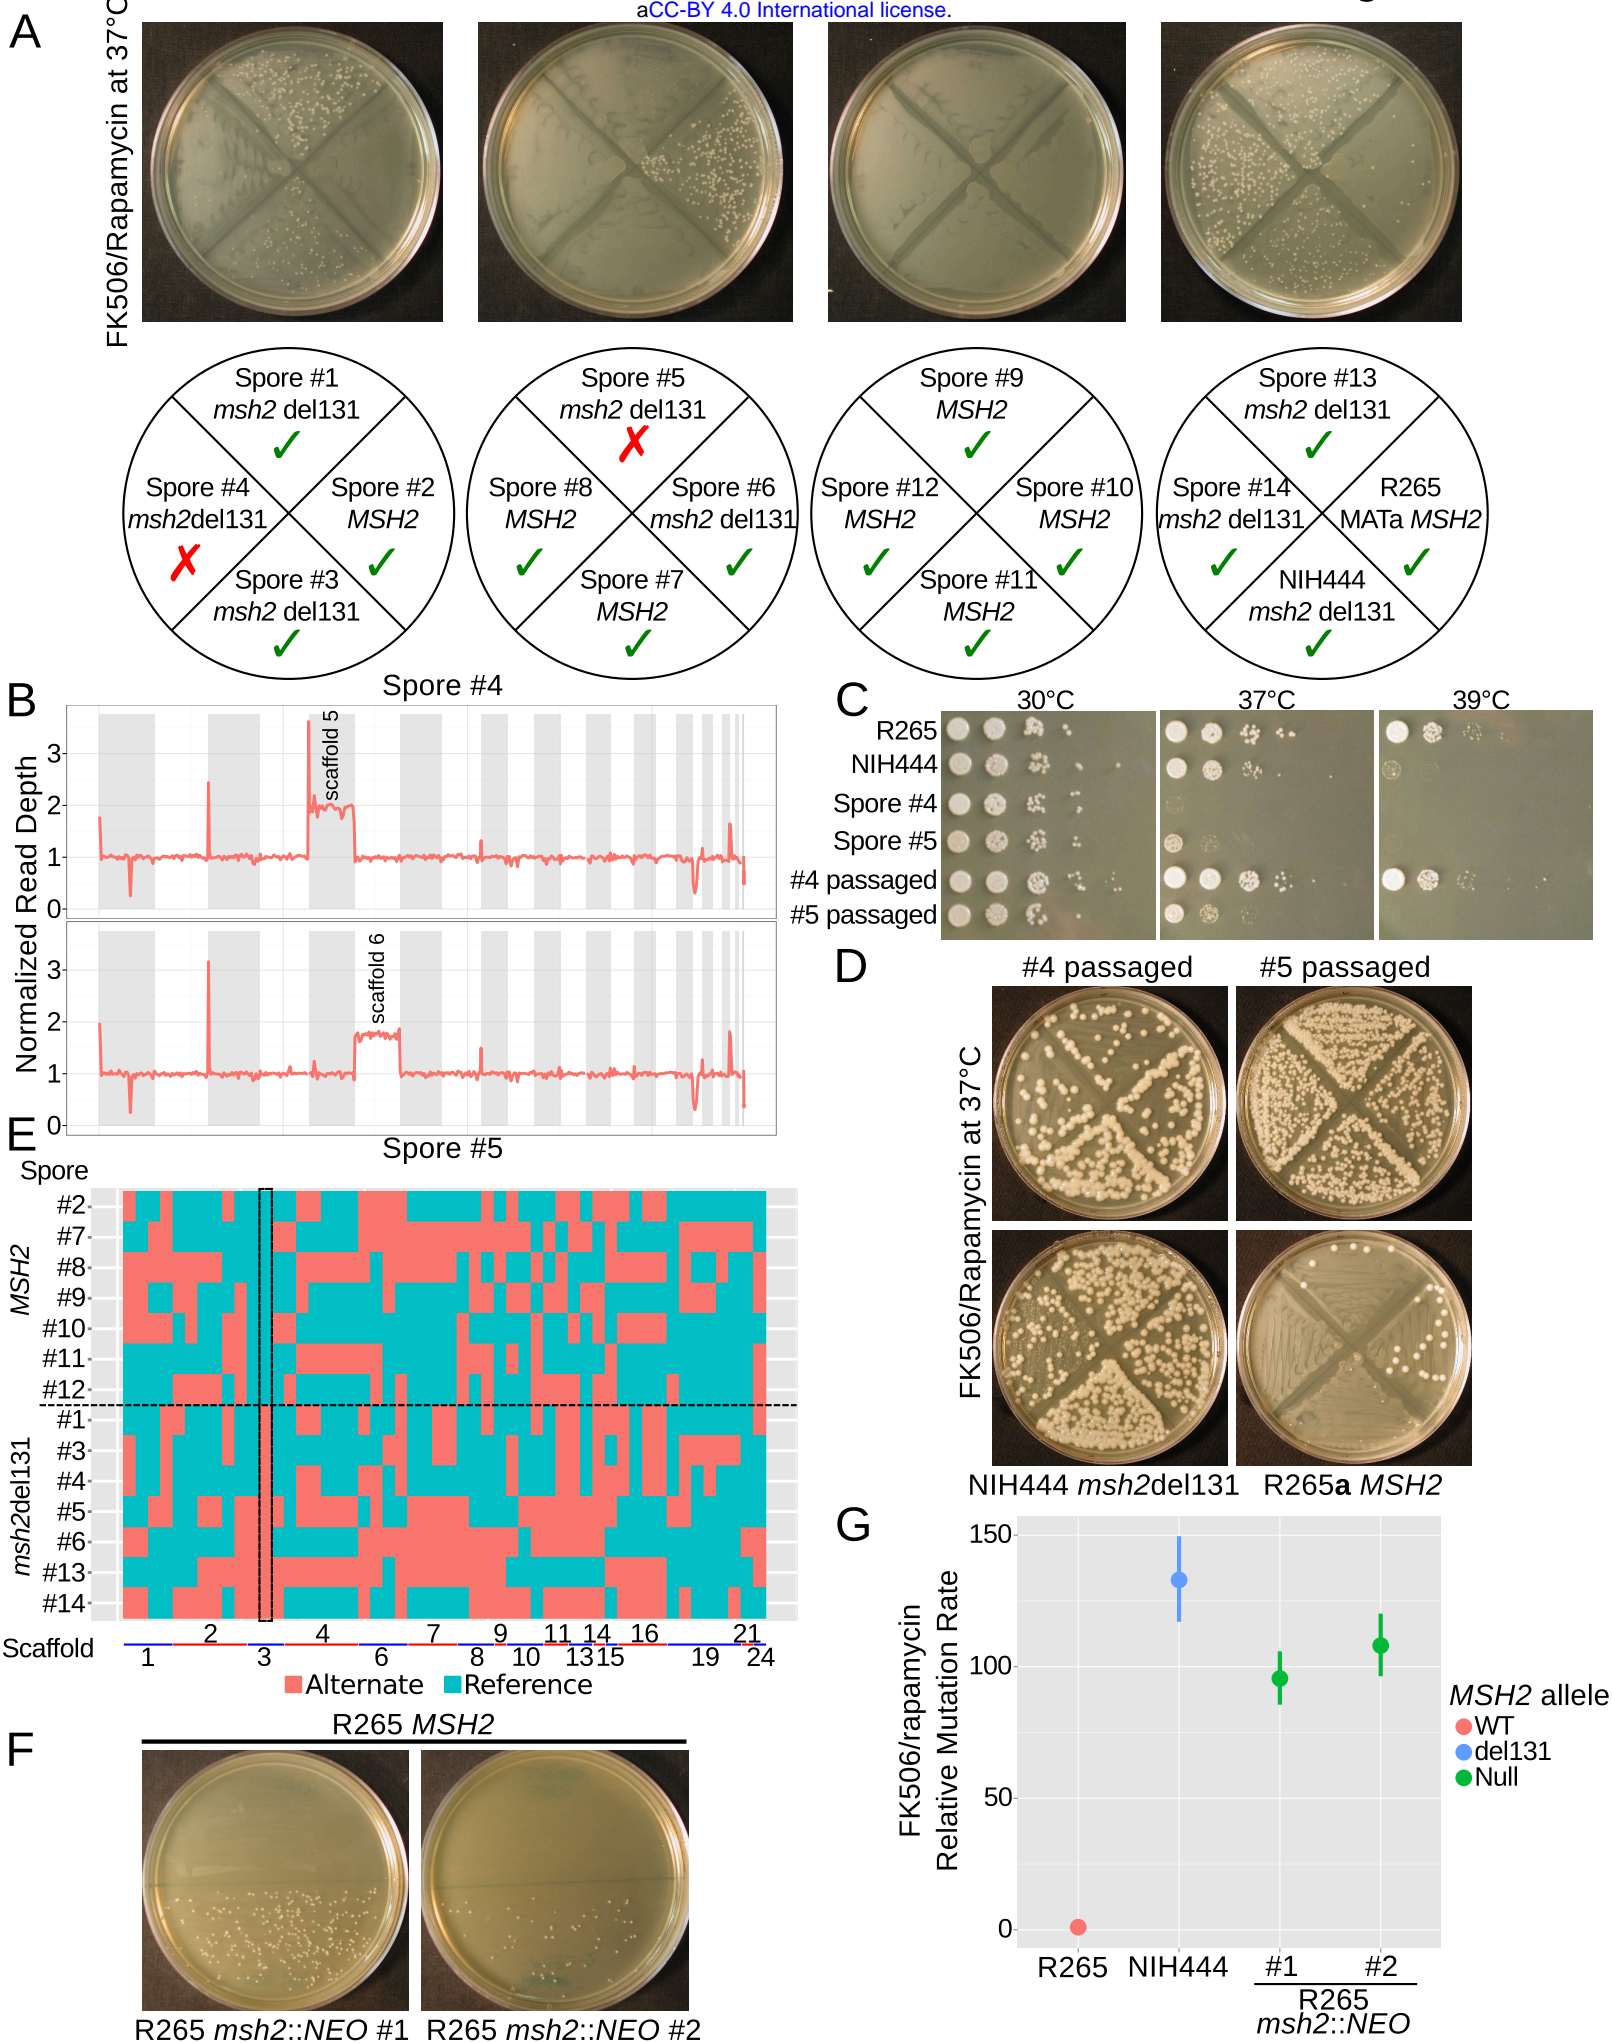

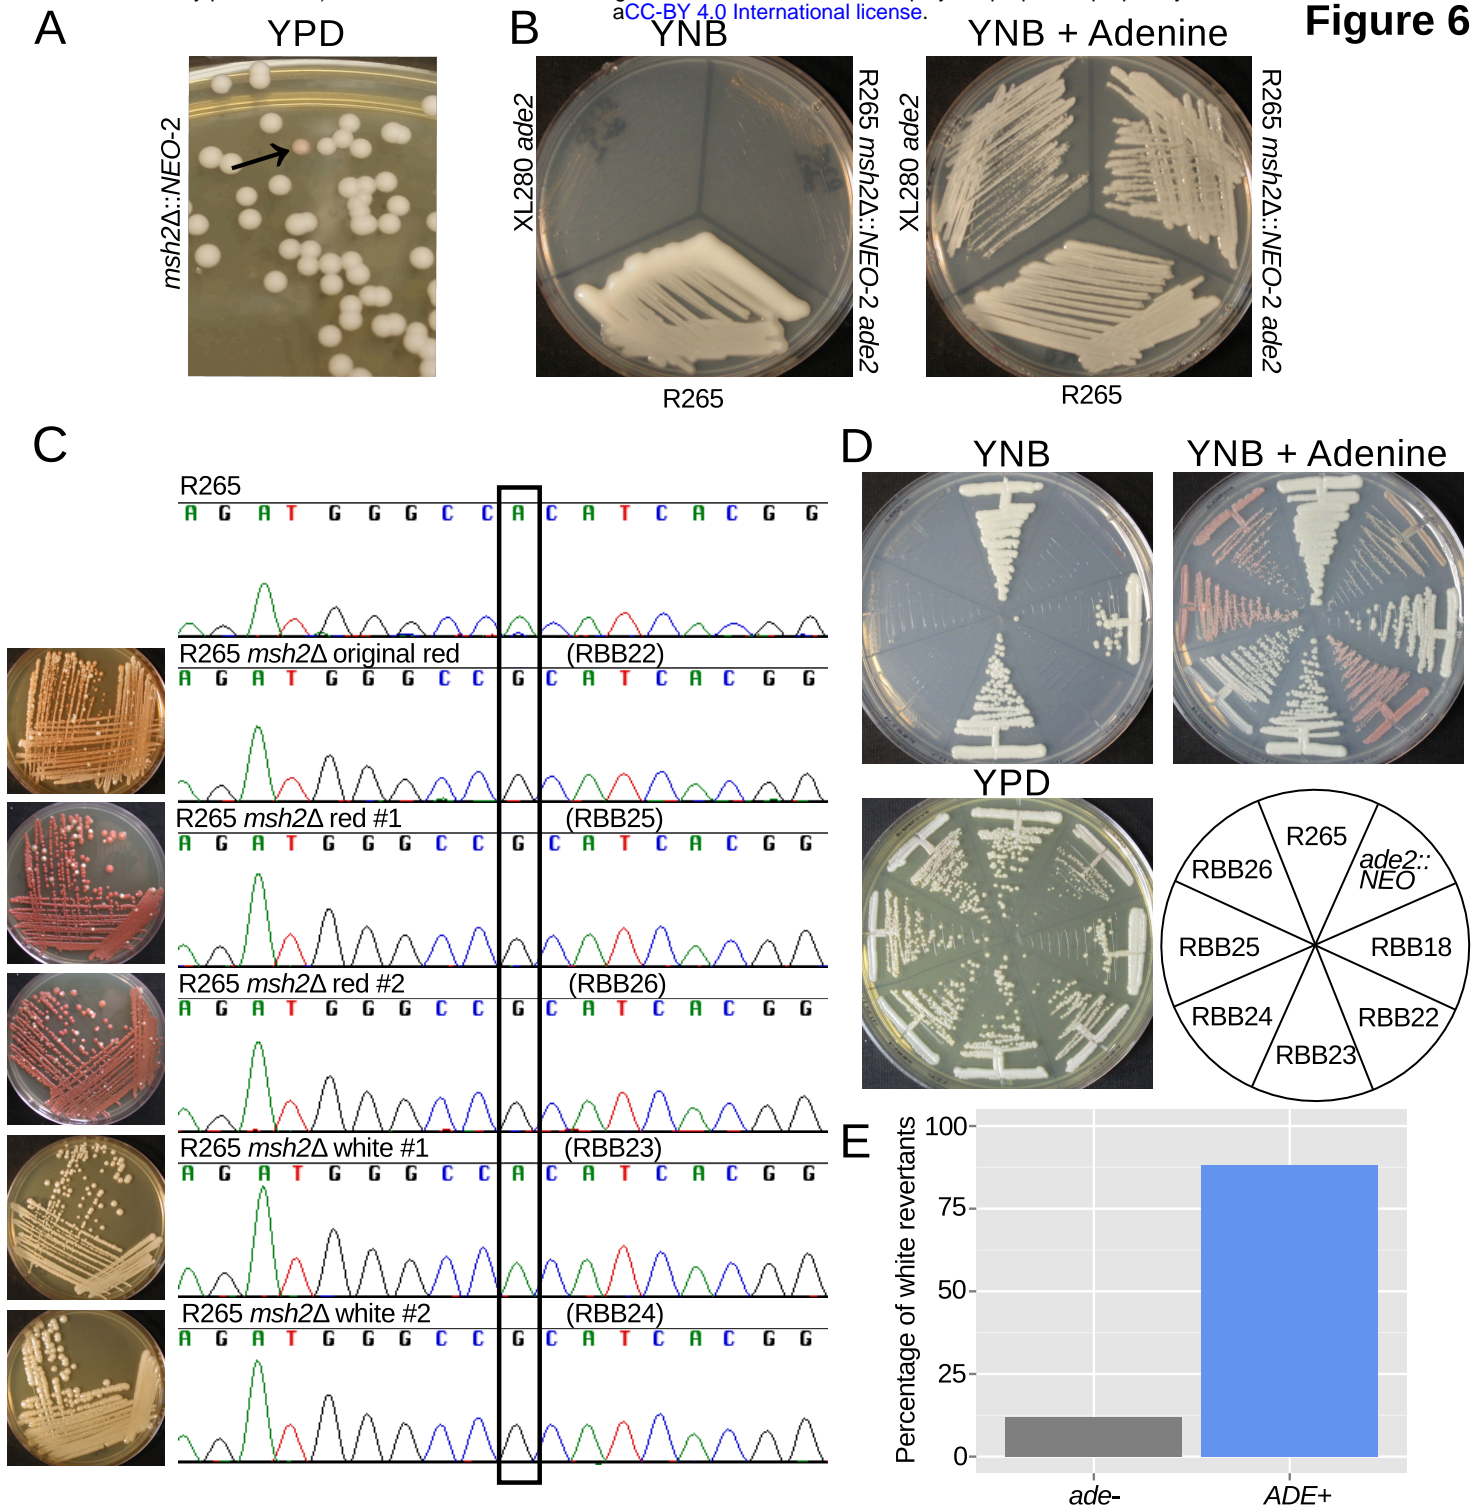

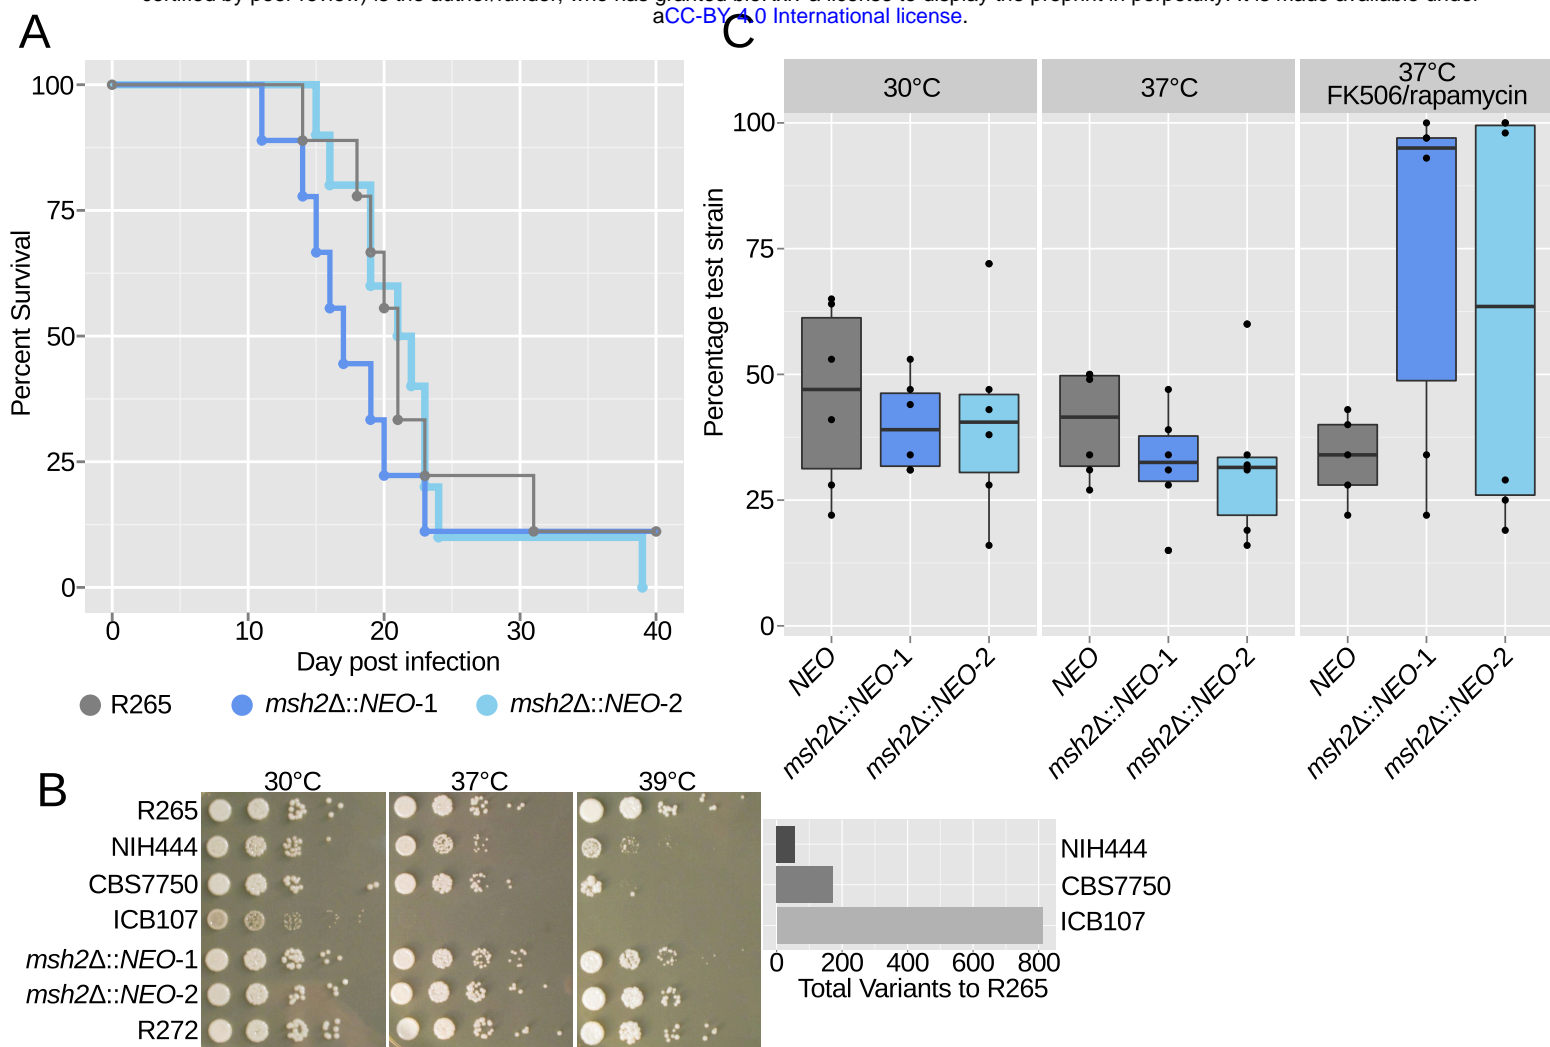

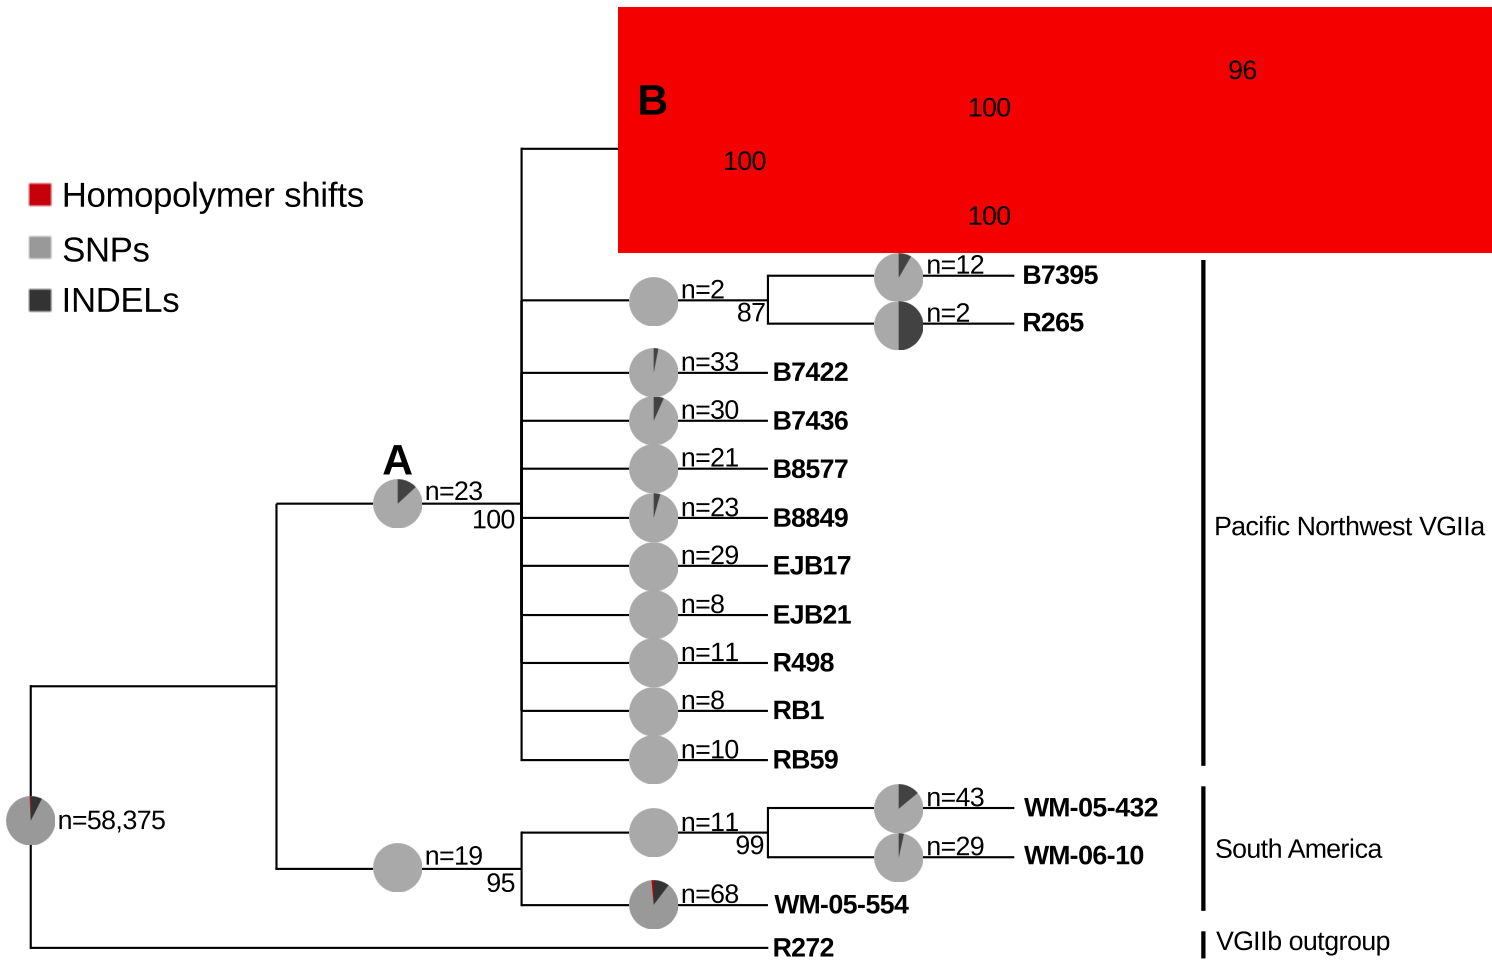



1 Table 1. Mutations shared by VGIIa-like strains relative to VGIIa

| Mutation | Location             | Predicted Effect     | Gene      | Predicted Function     |
|----------|----------------------|----------------------|-----------|------------------------|
| SNP      | SC2.1:1493731        | Missense (Ser->Pro)  | CNBG_0538 | t-RNA ligase           |
| SNP      | SC2.2:591810         | Splice site acceptor | CNBG_0776 | HAD hydrolase          |
| SNP      | SC2.2:965997         | Missense (Gly->Asp)  | CNBG_0907 | Clp protease subunit   |
| SNP      | SC2.4:899106         | Missense (Leu->Val)  | CNBG_1894 | RhoGEF                 |
| SNP      | SC2.6:160627         | Missense (Ala->Val)  | CNBG_2540 | Ubiquitin-like         |
| SNP      | SC2.6:410824         | Intergenic           | -         |                        |
| SNP      | SC2.6:1157157        | Intergenic           | -         |                        |
| SNP      | SC2.7:290975         | Missense (His->Tyr)  | CNBG_3034 | BRCT domain-containing |
| SNP      | SC2.8:594146         | Synonymous           | CNBG_3547 | snRNP                  |
| SNP      | SC2.10:94373         | Intronic             | CNBG_3750 | Dcp2                   |
| SNP      | SC2.13:413395        | Missense (Leu->Ser)  | CNBG_4876 | esterase               |
| SNP      | SC2.15:96883         | Intergenic           | -         |                        |
| SNP      | SC2.16:143098        | Missense (Pro->Leu)  | CNBG_5437 | Protein kinase Nrc2    |
| INDEL    | SC2.1:15401-15402    | Intronic             | CNBG_0005 | sugar metabolism       |
| INDEL    | SC2.3:240763-240764  | Nonsense             | CNBG_1661 | Msh2                   |
| INDEL    | SC2.9:241948-241949  | Intronic             | CNBG_4065 | SAM methyltransferase  |
| INDEL    | SC2.14:162875-162876 | Intergenic           | -         |                        |
| INDEL    | SC2.15:299154-299155 | Intergenic           | -         |                        |

2

3

4 Table 2. Aneuploidy in NIH444 x R265a cross

| Spore # | Aneuploid scaffold(s) | <i>MSH2</i> allele |
|---------|-----------------------|--------------------|
| 1       | -                     | <i>msh2del131</i>  |
| 2       | 19,21,26              | WT                 |
| 3       | -                     | <i>msh2del131</i>  |
| 4       | 5                     | <i>msh2del131</i>  |
| 5       | 6                     | <i>msh2del131</i>  |
| 6       | -                     | <i>msh2del131</i>  |
| 7       | 6                     | WT                 |
| 8       | -                     | WT                 |
| 9       | 6                     | WT                 |
| 10      | 6                     | WT                 |
| 11      | 6                     | WT                 |
| 12      | -                     | WT                 |
| 13      | -                     | <i>msh2del131</i>  |
| 14      | 19,21,26              | <i>msh2del131</i>  |

5

### YPD + FK506/rapamycin at 37°C

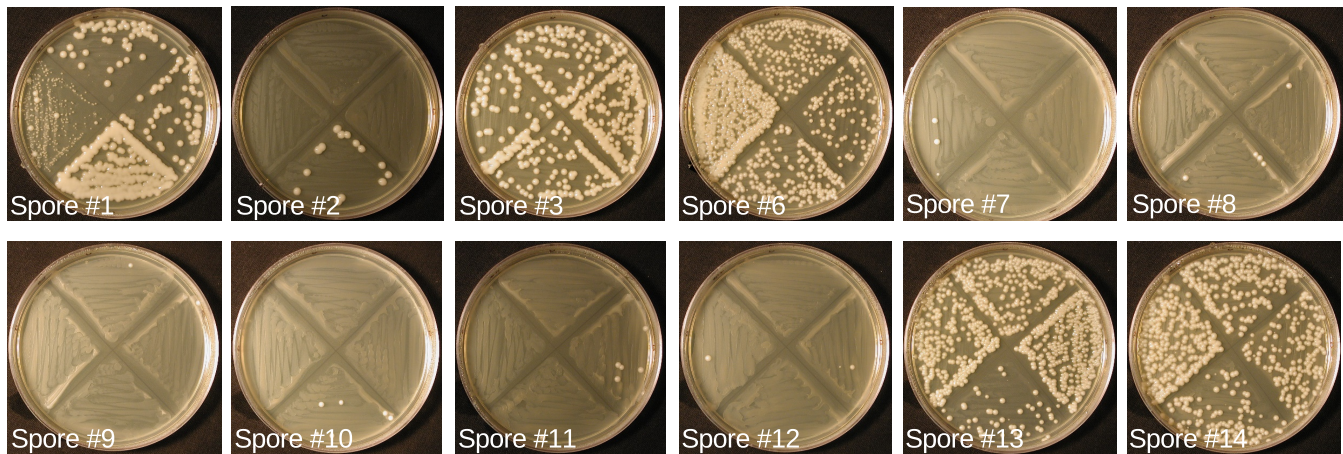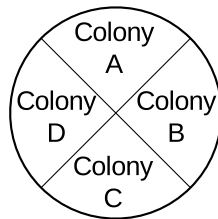

Passaged spores

YNB

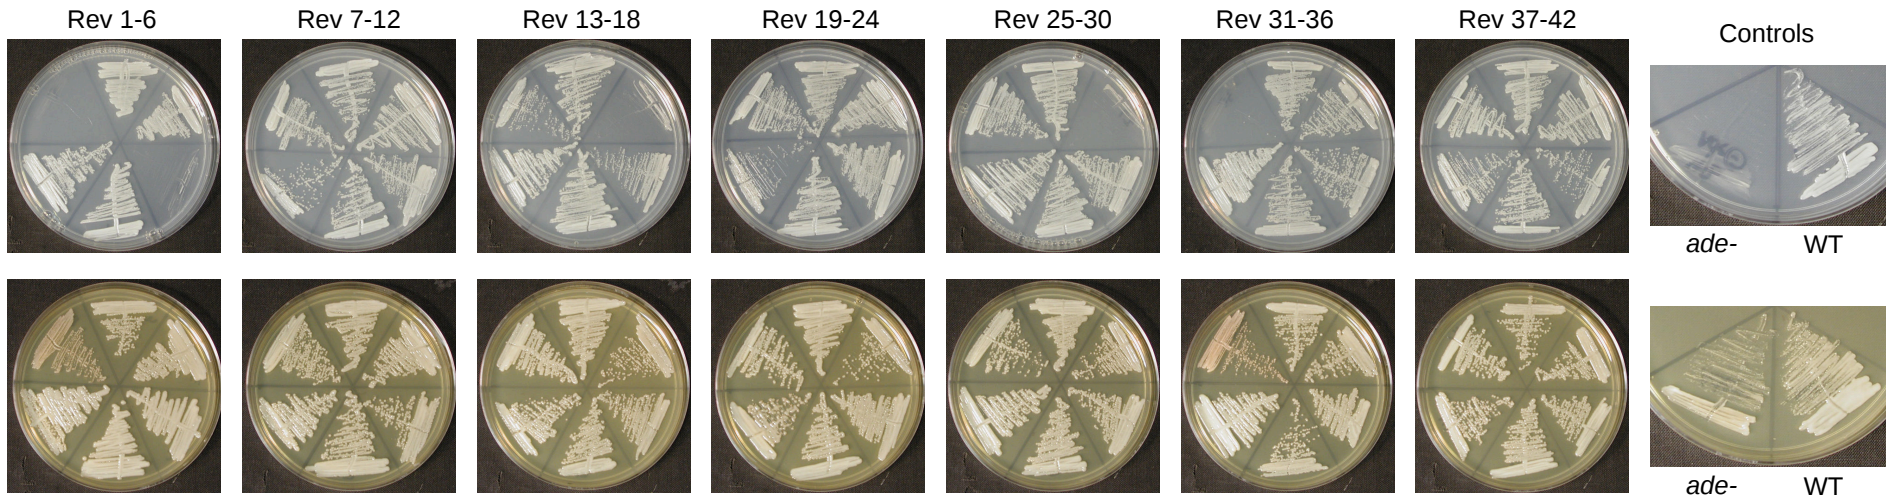

YPD
